1 **Engineering a Decoy Substrate in Soybean to Enable Recognition of the Soybean**  
2 ***Mosaic Virus* Nla Protease**

3

4 Matthew Helm<sup>1</sup>, Mingsheng Qi<sup>2</sup>, Shayan Sarkar<sup>2</sup>, Haiyue Yu<sup>2</sup>, Steven A. Whitham<sup>2</sup>, and  
5 Roger W. Innes<sup>1\*</sup>

6

7 1. Department of Biology, Indiana University, Bloomington, IN 47405, U.S.A.

8 2. Department of Plant Pathology and Microbiology, Iowa State University, Ames, IA  
9 50011, U.S.A.

10

11 **ORCID IDs:** M.H., [0000-0002-0385-8040](https://orcid.org/0000-0002-0385-8040); M.Q., 0000-0003-2448-1227; S.S., 0000-  
12 0003-0865-1767; H.Y., 0000-0002-1297-8917; S.A.W., [0000-0003-3542-3188](https://orcid.org/0000-0003-3542-3188); R.W.I.,  
13 [0000-0001-9634-1413](https://orcid.org/0000-0001-9634-1413)

14

15

16 **\*Corresponding author:**

17 Roger W. Innes

18 Department of Biology

19 Indiana University

20 Myers Hall 316B

21 Bloomington, IN 47405, USA

22 Phone: (812) 855-2219

23 Email: [rinnes@indiana.edu](mailto:rinnes@indiana.edu)

24

25 **Abstract**

26           In Arabidopsis, recognition of the AvrPphB effector protease from *Pseudomonas*  
27 *syringae* is mediated by the disease resistance (R) protein RPS5, which is activated by  
28 AvrPphB-induced cleavage of the Arabidopsis protein kinase PBS1. The recognition  
29 specificity of RPS5 can be altered by substituting the AvrPphB cleavage site within PBS1  
30 with cleavage sequences for other proteases, including proteases from viruses. AvrPphB  
31 also activates defense responses in soybean (*Glycine max*), suggesting that soybean  
32 may contain an R protein analogous to RPS5. It was unknown, however, whether this  
33 response is mediated by cleavage of a soybean PBS1-like protein. Here we show that  
34 soybean contains three *PBS1* orthologs and that their products are cleaved by AvrPphB.  
35 Further, transient expression of soybean PBS1 derivatives containing a five-alanine  
36 insertion at their AvrPphB cleavage sites activated cell death in soybean protoplasts,  
37 demonstrating that soybean likely contains an AvrPphB-specific resistance protein that is  
38 activated by a conformational change in soybean PBS1 proteins. Significantly, we show  
39 that a soybean PBS1 decoy protein modified to contain a cleavage site for the *Soybean*  
40 *mosaic virus* (SMV) NIa protease triggers cell death in soybean protoplasts when cleaved  
41 by this protease, indicating that the PBS1 decoy approach will work in soybean using  
42 endogenous *PBS1* genes. Lastly, we show that activation of the AvrPphB-dependent cell  
43 death response effectively inhibits systemic spread of SMV in soybean. These data also  
44 indicate that decoy engineering may be feasible in other crop plant species that recognize  
45 AvrPphB protease activity.

46

47

## 48 **Introduction**

49 'Decoy' engineering is an emerging approach that aims to expand the recognition  
50 specificity of intracellular disease resistance proteins in order to generate entirely novel  
51 recognition specificities. In this approach, a host protein is engineered to function as a  
52 substrate for pathogen-derived effectors (i.e. a decoy) (Harris *et al.*, 2013; Segretin *et al.*,  
53 2014; Stirnweis *et al.*, 2014; Giannakopoulou *et al.*, 2015; Maqbool *et al.*, 2015). Effector-  
54 dependent modification of the decoy triggers activation of an intracellular disease  
55 resistance protein, culminating in a hypersensitive response (HR) and disease resistance  
56 (Harris *et al.*, 2013; Segretin *et al.*, 2014; Stirnweis *et al.*, 2014; Giannakopoulou *et al.*,  
57 2015; Maqbool *et al.*, 2015). An example of using decoys to expand the recognition  
58 spectrum of an intracellular disease resistance protein is the Arabidopsis RPS5-PBS1  
59 recognition module (Kim *et al.*, 2016). In this system, Arabidopsis PBS1 functions as a  
60 substrate for the *P. syringae* pv. *phaseolicola* cysteine protease, AvrPphB (Zhu *et al.*,  
61 2004). Cleavage of Arabidopsis PBS1 by AvrPphB activates the Arabidopsis nucleotide-  
62 binding leucine-rich repeat protein (NLR), RPS5, which confers resistance to *P. syringae*  
63 (Shao *et al.*, 2003; Ade *et al.*, 2007; DeYoung *et al.*, 2012). Kim *et al.* (2016) demonstrated  
64 that the AvrPphB cleavage site sequence within Arabidopsis PBS1 can be substituted  
65 with a protease cleavage site sequence recognized by other pathogen-derived proteases,  
66 thereby generating a synthetic PBS1 decoy. Protease-dependent cleavage of the PBS1  
67 decoy enables activation of RPS5, which was demonstrated for proteases derived from  
68 both bacteria and viruses (Kim *et al.*, 2016). These findings thus provide compelling  
69 evidence that engineering decoys based on the Arabidopsis RPS5-PBS1 recognition

70 module may be an effective NLR gene-based strategy to control plant diseases in crop  
71 plants.

72         Creation of a decoy recognition system in crop plants based on PBS1 may not  
73 require use of Arabidopsis genes. Arabidopsis *PBS1* is a well-conserved defense gene,  
74 with orthologs present in monocot and dicot crop plant species (Caldwell and Michelmore,  
75 2009). Importantly, AvrPphB has been shown to cleave PBS1 orthologs from both wheat  
76 and barley, and to induce an HR in these species, as well as in soybean (Russell *et al.*,  
77 2015; Sun *et al.*, 2017; Carter *et al.*, in press). Carter *et al.* (in press) recently mapped the  
78 AvrPphB response in barley to a single locus containing an NLR gene, *AvrPphB*  
79 *Resistance 1* (*Pbr1*). Significantly, PBR1 co-immunoprecipitates with barley and *N.*  
80 *benthamiana* PBS1 proteins and co-expression of PBR1 with AvrPphB activates a cell  
81 death response in *N. benthamiana* (Carter *et al.*, in press). It is thus likely that other crop  
82 plants that recognize AvrPphB protease activity also contain an AvrPphB-specific  
83 resistance protein that guards PBS1 orthologous proteins.

84         In the present study, we sought to generate PBS1-based decoys in soybean that  
85 would confer recognition of the NIa protease from *Soybean mosaic virus* (SMV; genus  
86 *Potyvirus*). SMV is the most widespread virus that infects soybean and is responsible for  
87 significant economic losses worldwide (Whitham *et al.*, 2016; Hajimorad *et al.*, 2018). In  
88 addition, the prevalence and severity of losses to SMV in the United States have  
89 increased over the last two decades, which has been primarily attributed to the  
90 introduction of the soybean-colonizing aphid (*Aphis glycines*), a vector for SMV (Hartman  
91 *et al.*, 2001; Hill *et al.*, 2001; Clark and Perry, 2002). SMV is a single-stranded, positive-  
92 sense filamentous RNA virus (Whitham *et al.*, 2016; Hajimorad *et al.*, 2018). Upon SMV

93 infection, the viral RNA is translated as a precursor polyprotein that is proteolytically  
94 processed by three SMV-encoded proteases at internal cleavage sites to produce mature,  
95 multifunctional viral proteins, including P1 (protein 1), HC-Pro (helper component  
96 protease), P3 (protein 3), 6K1 (six kiloDalton 1), CI (cylindrical inclusion), 6K2 (six  
97 kiloDalton 2), NIa (nuclear inclusion a), NIb (nuclear inclusion b), and CP (coat protein)  
98 (Hajimorad *et al.*, 2018). Significantly, the NIa protease is the only SMV-encoded  
99 protease that acts in *trans* (Adams *et al.*, 2005). Further, the minimal amino acid sequence  
100 required for recognition by the SMV NIa protease has been previously characterized and  
101 is well conserved among SMV isolates (Ghabrial *et al.*, 1990; Jayaram *et al.*, 1992; Adams  
102 *et al.*, 2005). *Potyvirus* proteases are essential for processing the viral polyprotein into  
103 functional viral proteins (Adams *et al.*, 2005). We, therefore, hypothesize that a resistance  
104 protein activated by the enzymatic activity of the NIa protease would be a durable disease  
105 resistance trait as it would be unlikely SMV would simultaneously change specificity of  
106 the NIa protease and multiple protease cleavage sites embedded within the polyprotein.

107 The observation that soybean responds to AvrPphB with a hypersensitive  
108 response (Russell *et al.*, 2015) suggests that artificial soybean PBS1-based decoys can  
109 be engineered to detect the NIa protease from SMV. It was unclear, however, whether  
110 the endogenous soybean resistance protein that detects AvrPphB protease activity  
111 functions analogously to Arabidopsis RPS5.

112 Here, we show that soybean contains three plasma membrane-localized PBS1  
113 orthologous proteins (*GmPBS1-1*, *GmPBS1-2*, and *GmPBS1-3*) that are cleaved by  
114 AvrPphB. Significantly, transient expression of *GmPBS1* derivatives containing a five  
115 alanine insertion at the AvrPphB cleavage site (*GmPBS1*<sup>5Ala</sup>) induces cell death in the

116 absence of AvrPphB, demonstrating that *GmPBS1* proteins have a functional role in the  
117 innate immune response, likely by being guarded by an NLR protein functionally  
118 analogous to RPS5. Significantly, we demonstrate that replacing the native AvrPphB  
119 cleavage site sequence with a SMV Nla protease recognition site in *GmPBS1-1*  
120 (*GmPBS1-1<sup>SMV</sup>*) results in Nla-mediated cleavage, and such cleavage activates cell death  
121 in soybean protoplasts. Lastly, we show that SMV-mediated overexpression of AvrPphB  
122 inhibits systemic spread of SMV in soybean, demonstrating that the AvrPphB-dependent  
123 cell death response resulting from *GmPBS1* cleavage is effective against a viral  
124 pathogen. Collectively, these data suggest that synthetic PBS1-based decoys can be  
125 used to expand effector protease recognition in soybean and generating artificial decoys  
126 offers an attractive approach for engineering resistance to other soybean pathogens.

127

## 128 **Results**

129 **Soybean contains three *PBS1* genes that are co-orthologous to *Arabidopsis PBS1* and**  
130 **whose protein products are cleaved by AvrPphB**

131 *Pseudomonas syringae* pv. *glycinea* Race 4 (PsgR4) expressing the effector  
132 protease AvrPphB elicits a hypersensitive response in soybean (*Glycine max*), indicating  
133 that soybean contains an AvrPphB-specific disease resistance protein (Russell *et al.*,  
134 2015). To confirm these observations, we delivered AvrPphB or an enzymatically inactive  
135 derivative of AvrPphB, AvrPphB(C98S), to primary leaves of soybean (cv. Flambeau)  
136 using *P. syringae* pathovar *tomato* strain D36E, which lacks all known endogenous type  
137 III effectors (Wei *et al.*, 2015; Carter *et al.*, in press). Consistent with the observations of  
138 Russell *et al.* (2015), D36E(AvrPphB) induced an observable cell death response 24  
139 hours post-injection (hpi), while minimal cell death was observed with D36E(C98S), or

140 D36E carrying the empty vector (Supp. Fig. S1). These data indicate that soybean likely  
141 contains a disease resistance protein that can detect the protease activity of AvrPphB.

142         Given that Arabidopsis detects AvrPphB protease activity via sensing cleavage of  
143 the protein kinase PBS1, we hypothesized that soybean may employ a similar  
144 mechanism. We thus screened for soybean PBS1 homologs that can be cleaved by  
145 AvrPphB. Using the Arabidopsis PBS1 amino acid sequence (*AtPBS1*) as a query, we  
146 used BLAST to identify the top twenty soybean PBS1-like (*GmPBL*) protein sequences  
147 (release Williams82.a2.v1; <http://soybase.org>) (Grant *et al.*, 2010) with the most similarity  
148 to *AtPBS1*. Phylogenetic analysis showed that Glyma.08G360600, Glyma.10G298400,  
149 and Glyma.20G249600 are more closely related to *AtPBS1* than to other Arabidopsis or  
150 soybean PBL proteins (Fig. 1A; Supp. Fig. S2). Full-length amino acid alignments showed  
151 that Glyma.08G360600, Glyma.10G298400, and Glyma.20G249600 are 80%, 77%, and  
152 77% identical to *AtPBS1*, respectively (Supp. Fig. 3), with alignment across just the kinase  
153 domains showing even higher identities (91%, 92%, and 92%). Based on the structure of  
154 the phylogenetic tree, all three soybean genes are co-orthologous to *AtPBS1*. We  
155 therefore designated Glyma.08G360600 as *GmPBS1-1* (GenBank: MK035866),  
156 Glyma.10G298400 as *GmPBS1-2* (GenBank: MK035867), and Glyma.20G249600 as  
157 *GmPBS1-3* (GenBank: MK035868).

158         The AvrPphB cleavage site sequence is conserved in all three *GmPBS1* proteins  
159 (Supp. Fig. 3), suggesting that these proteins should be cleavable by AvrPphB. To test  
160 this, *GmPBS1-1*, *GmPBS1-2*, and *GmPBS1-3* were transiently co-expressed with  
161 AvrPphB in *Nicotiana benthamiana*. Immunoblot analysis showed that all three proteins  
162 are cleaved by AvrPphB and not by AvrPphB(C98S) (Fig. 1B), indicating that recognition

163 of AvrPphB in soybean could be mediated by cleavage of one, or more, of these three  
164 *GmPBS1* proteins.

165 In Arabidopsis, detection of PBS1 cleavage occurs at the plasma membrane, and  
166 *AtPBS1* is targeted to the plasma membrane via N-terminal myristoylation and  
167 palmitoylation motifs (Qi *et al.*, 2014). These motifs are conserved in all three *GmPBS1*  
168 proteins (Supp. Fig. 3), so we assessed whether these proteins are also targeted to the  
169 plasma membrane using transient expression of superYFP-tagged versions in *N.*  
170 *benthamiana*. All three proteins displayed a clear plasma membrane localization pattern,  
171 co-localizing with the known plasma membrane protein, *AtFLS2* (Fig. 1C).

172

### 173 **Insertion of five alanine residues in the AvrPphB cleavage site of soybean PBS1** 174 **proteins activates cell death in the absence of AvrPphB-mediated cleavage**

175 The above data are consistent with AvrPphB being recognized via cleavage of one  
176 or more *GmPBS1* proteins, but do not prove it. In Arabidopsis, AvrPphB targets at least  
177 nine Arabidopsis PBS1-like (*AtPBL*) proteins (Zhang *et al.*, 2010; DeYoung *et al.*, 2012).  
178 It is therefore a formal possibility that soybean detects AvrPphB protease activity by  
179 sensing cleavage of an AvrPphB substrate other than *GmPBS1* proteins. To assess  
180 whether *GmPBS1* cleavage does indeed activate resistance in soybean, we inserted five  
181 alanine residues at the AvrPphB cleavage site of *GmPBS1-1* (*GmPBS1-1*<sup>5Ala</sup>; Fig. 2A).  
182 An equivalent insertion in *AtPBS1* induces a conformational change that activates RPS5-  
183 dependent cell death in Arabidopsis in the absence of AvrPphB expression (DeYoung *et*  
184 *al.*, 2012). We thus hypothesized that a five-alanine insertion into one of the *GmPBS1*  
185 proteins would activate the AvrPphB-specific R protein in soybean, and thus induce cell



186 death. We selected *GmPBS1-1* for this assay because it is the most abundantly  
187 expressed of the three *GmPBS1* co-orthologs in leaves (Libault *et al.*, 2010). We then  
188 transiently transfected soybean (cv. Williams 82) protoplasts with either *GmPBS1-1* or  
189 the *GmPBS1-1<sup>5Ala</sup>* derivative along with a *Renilla* luciferase reporter (Fig. 2B). In this  
190 assay, a reduction in luciferase activity indicates activation of cell death. As positive  
191 controls for cell death, we transiently expressed AvrB or AvrPphB, which activate a  
192 hypersensitive response in Williams 82 (Ashfield *et al.*, 2004). Consistent with our  
193 hypothesis, transient expression of *GmPBS1-1<sup>5Ala</sup>*, but not wild-type *GmPBS1-1*, induced  
194 cell death similar to that observed with AvrB and AvrPphB, demonstrating that insertion  
195 of five alanine residues in the activation loop of *GmPBS1-1* activates a cell death  
196 response in soybean (Fig. 2B). To test whether the cell death response is specific to  
197 *GmPBS1-1*, we transiently transfected soybean protoplasts with either *GmPBS1-2* or  
198 *GmPBS1-2<sup>5Ala</sup>* and quantified luciferase activity. Transient expression of *GmPBS1-2<sup>5Ala</sup>*,  
199 but not *GmPBS1-2*, also induced cell death equivalent to AvrB and AvrPphB (Supp. Fig.  
200 S4A). Collectively, these data suggest that soybean likely senses AvrPphB protease  
201 activity via cleavage of a *GmPBS1* protein, analogous to the Arabidopsis RPS5-PBS1  
202 recognition system.

203

204 ***Soybean mosaic virus (SMV) NIa protease-mediated cleavage of GmPBS1-1<sup>SMV</sup>***  
205 **decoy protein activates cell death in soybean protoplasts**

206 Our evidence suggesting that soybean contains an AvrPphB recognition system  
207 functionally analogous to the Arabidopsis RPS5-PBS1 pathway raises the possibility that  
208 soybean PBS1 proteins can be modified to enable cleavage by other pathogen proteases,

209 and thus expand the recognition specificity of the AvrPphB-specific R protein in soybean.  
210 We have previously shown that *At*PBS1 can be modified to be cleaved by the Nla  
211 protease from *Turnip mosaic virus* (TuMV), with transgenic *Arabidopsis* plants expressing  
212 this 'decoy' protein displaying enhanced resistance to TuMV (Kim *et al.*, 2016). To create  
213 a suitable soybean PBS1 decoy protein for detection of *Soybean mosaic virus* (SMV), we  
214 replaced the AvrPphB cleavage site sequence in the activation loop of *Gm*PBS1-1 with a  
215 known SMV Nla protease cleavage sequence [ESVLSQS; (Ghabrial *et al.*, 1990)] (Fig.  
216 3A). As shown in Fig. 3B, *Gm*PBS1-1<sup>SMV</sup> is cleaved by SMV Nla protease when  
217 transiently co-expressed in *N. benthamiana*, but not by AvrPphB, while wild-type  
218 *Gm*PBS1-1 is cleaved by AvrPphB, but not by the SMV Nla protease. We then tested for  
219 activation of cell death in soybean cells using the protoplast transformation system  
220 described above. Co-expression of the Nla protease with *Gm*PBS1-1<sup>SMV</sup> resulted in a  
221 significant reduction in luciferase activity compared to co-expression with wild-type  
222 *Gm*PBS1-1, indicating that Nla-mediated cleavage of the *Gm*PBS1-1<sup>SMV</sup> decoy activates  
223 cell death in soybean cells (Fig. 3C). To test whether *Gm*PBS1-2 and *Gm*PBS1-3 could  
224 also serve as decoys, we replaced the AvrPphB cleavage site sequence with the Nla  
225 protease cleavage sequence (Supp. Figs. 5A and 5B). Transient co-expression of either  
226 the *Gm*PBS1-2<sup>SMV</sup> or *Gm*PBS1-3<sup>SMV</sup> with the Nla protease in *N. benthamiana* resulted in  
227 Nla-mediated cleavage of the decoy proteins (Supp. Figs. 5C and 5D). These data thus  
228 suggest synthetic soybean PBS1 proteins can serve as decoys for the Nla protease from  
229 SMV, thereby expanding the recognition specificity of the AvrPphB-specific R protein in  
230 soybean.  
231

232 **Recognition of AvrPphB protease activity in soybean inhibits systemic spread of**  
233 **SMV**

234 Our evidence demonstrating that soybean PBS1 proteins can be engineered to  
235 confer recognition of the Nla protease from SMV suggests decoy engineering can be  
236 extended into soybean. It is unclear, however, whether the cell death response elicited  
237 by AvrPphB protease activity is effective against SMV in soybean. Kim *et al.* (2016)  
238 showed that Arabidopsis RPS5 can be activated by sensing cleavage of an engineered  
239 PBS1 decoy by the Nla protease from TuMV, thereby broadening its recognition  
240 specificity. However, infection of transgenic Arabidopsis expressing the PBS1 decoy  
241 protein by TuMV resulted in a lethal systemic necrosis phenotype, demonstrating that  
242 RPS5-mediated defense responses confers only partial resistance against TuMV (Kim *et*  
243 *al.*, 2016). To test whether activation of the AvrPphB-dependent cell death response could  
244 inhibit systemic spread of SMV in soybean, we used an SMV-mediated transient  
245 expression system to transiently express green fluorescent protein (GFP), AvrPphB or  
246 AvrPphB(C98S) in soybean. Using this approach, (Wang *et al.*, 2006) showed that AvrB,  
247 an effector from *P. syringae* pv. *glycinea*, activates defense responses and inhibits  
248 systemic spread of SMV into the upper, uninoculated trifoliate leaflets of soybean (cv.  
249 Harosoy). We inserted the open reading frames (ORFs) encoding AvrPphB and  
250 AvrPphB(C98S) into pSMV-Nv (Fig. 4A). Primary leaves of soybean were mechanically  
251 inoculated with DNA of either pSMV-Nv::*GFP*, pSMV-Nv::*AvrPphB*, or pSMV-  
252 Nv::*AvrPphB*. Consistent with the observations of Wang *et al.* (2006), insertion of the GFP  
253 ORF resulted in development of mosaic symptoms and leaf rugosity in the systemic,  
254 uninoculated trifoliate leaflets indicative of successful SMV infection (Fig. 4B). In addition

255 to the observed SMV symptoms, immunoblot analysis showed detectable SMV coat  
256 protein (SMV CP) and GFP protein accumulation in the systemic, uninoculated fourth  
257 trifoliolate leaflet (Fig. 4C), demonstrating the recombinant virus did not spontaneously  
258 delete the 0.7kb insert and that GFP is stably expressed *in planta*. In contrast, inoculation  
259 of leaves with pSMV-Nv::*AvrPphB* did not result in any systemic SMV symptoms, and no  
260 *AvrPphB* or SMV CP accumulation was detected in the fourth trifoliolate leaflet three weeks  
261 post-inoculation (Figs. 4B and 4C). Expression of pSMV-Nv::*AvrPphB(C98S)*, however,  
262 resulted in mosaic symptoms and leaf rugosity similar to that observed with pSMV-  
263 Nv::*GFP*, as well as detectable *AvrPphB* protein accumulation in the fourth trifoliolate leaflet  
264 (Figs. 4B and 4C). Collectively, these data suggest that activation of the *AvrPphB*-  
265 dependent cell death response effectively inhibits systemic spread of SMV in soybean  
266 and, therefore, synthetic decoy engineering may be an effective strategy for engineering  
267 resistance to SMV.

268

## 269 **Discussion**

270 We have previously shown that *AvrPphB* activates a hypersensitive response in  
271 most soybean varieties (Russell *et al.*, 2015), but it was unclear whether this response  
272 was mediated by cleavage of a PBS1-like protein, and hence whether it would be feasible  
273 to use a PBS1 decoy strategy to engineer novel recognition specificities in soybean. To  
274 address these questions, we first identified soybean *PBS1* orthologs, and assessed  
275 whether the encoded proteins were cleaved by *AvrPphB* (Fig. 1). These analyses  
276 confirmed that *GmPBS1* proteins are cleaved by *AvrPphB*, suggesting that *AvrPphB*

277 protease activity may be activating NLR-triggered immunity in soybean via a mechanism  
278 similar to that employed by *Arabidopsis* (Ade *et al.*, 2007).

279 To confirm that *GmPBS1* modification activates cell death in soybean, we  
280 developed a protoplast transformation assay. Research in soybean is often hampered  
281 by the lack of rapid, reproducible transient gene expression methods. Our demonstration  
282 of reproducible protoplast assays for cell death following *GmPBS1* cleavage thus opens  
283 up many possibilities for investigating soybean immune signaling. Although routinely  
284 used to assess gene function in other plant species, protoplast transformation is often  
285 technically challenging, and a robust method for preparation and transformation of  
286 soybean protoplasts has only recently been reported (Wu and Hanzawa, 2018). Wu and  
287 Hanzawa (2018) demonstrated expression of GFP, and the nuclear localization of the E1  
288 protein (Glyma.06G207800) fused to GFP in soybean protoplasts isolated from the  
289 Williams 82 cultivar. Prior to this work, there have been few publications regarding the  
290 preparation or use of protoplasts from soybean (Wu and Hanzawa, 2018). These include  
291 recent papers by (Sun *et al.*, 2015) and (Kim *et al.*, 2017) who reported gene editing in  
292 protoplasts of the Williams 82 soybean cultivar following delivery of DNA constructs  
293 expressing Cas9 and guide RNA transgenes and Cpf1 – CRISPR RNA ribonucleoprotein  
294 complexes, respectively. However, their methods were not described in detail and  
295 referred to methods for preparing protoplasts from *Arabidopsis* leaves or cabbage  
296 cotyledons. These recent studies illustrate the value of using protoplasts to rapidly  
297 demonstrate the application of new biotechnology tools in soybean. In *Arabidopsis*, the  
298 use of protoplasts has provided important insight into pattern-recognition receptor-  
299 triggered and NLR-triggered signaling mechanisms (He *et al.*, 2007). Here, we

300 demonstrated that soybean protoplasts are useful for rapidly interrogating the functions  
301 of proteins in effector-triggered immune signaling.

302         Once we confirmed that we could express luciferase in soybean protoplasts, we  
303 tested whether *GmPBS1-1* or *GmPBS1-2* containing a five-alanine insertion at the  
304 AvrPphB cleavage site activated cell death, as assessed by a reduction in luciferase  
305 expression. These assays showed that both proteins can activate cell death in the  
306 absence of AvrPphB (Fig. 2 and Supp. Fig. S4). An equivalent insertion in the Arabidopsis  
307 PBS1 protein activates the Arabidopsis RPS5 NLR resistance protein, leading to  
308 activation of a hypersensitive response (DeYoung *et al.*, 2012; Kim *et al.*, 2016); thus,  
309 these data strongly suggest that soybean contains a putative NLR protein functionally  
310 analogous to RPS5 that is activated by a conformational change in soybean PBS1  
311 proteins. Collectively, these data indicate that it should be possible to engineer novel  
312 disease resistance specificities in soybean using a PBS1-based decoy strategy, as was  
313 done in Arabidopsis (Kim *et al.*, 2016).

314         To enable recognition of the Nla protease from SMV, we replaced the AvrPphB  
315 cleavage site within *GmPBS1-1* with a seven-amino acid sequence cleaved by the Nla  
316 protease (Fig. 3). Co-expression of this decoy derivative of *GmPBS1-1* with the Nla  
317 protease triggered cell death in soybean protoplasts, indicating that the PBS1 decoy  
318 approach will work in soybean using endogenous *PBS1* genes. Significantly, *GmPBS1-*  
319 *2<sup>SMV</sup>* and *GmPBS1-3<sup>SMV</sup>* were also cleaved by the Nla protease and can thus likely serve  
320 as suitable decoys for the SMV Nla protease (Supp. Fig. S4; Supp. Fig. S5). These data  
321 strongly suggest that multiple, synthetic soybean PBS1-based decoys can be deployed  
322 in parallel to enable recognition of several soybean pathogens at once. We are now in

323 the process of generating transgenic soybean lines expressing the *GmPBS1-1*<sup>SMV</sup>  
324 construct.

325 The evidence presented herein suggests decoy engineering may be an effective  
326 strategy to confer resistance against SMV. In support of this expectation, we found that  
327 expression of AvrPphB protein from the SMV genome renders SMV avirulent in soybean,  
328 whereas a protease inactive AvrPphB mutant does not (Fig. 4). These data thus indicate  
329 that the defense responses elicited from AvrPphB-mediated cleavage of the soybean  
330 PBS1 proteins is effective against SMV in soybean. Our data are consistent with the  
331 observations of Wang *et al.* (2006), who showed that expression of the *P. syringae* AvrB  
332 protein from the SMV genome also inhibits systemic SMV infection. Additionally,  
333 expression of the *P. syringae* AvrPto protein from a *Potato virus X* (PVX)-based vector  
334 elicits defense responses that prevent systemic spread of PVX in tomato (Tobias *et al.*,  
335 1999). These data establish that plant disease resistance proteins that normally confer  
336 resistance to *P. syringae*, will also confer resistance to viral pathogens when activated,  
337 likely due to rapid hypersensitive cell death responses. Such disease resistance proteins  
338 are thus ideal targets for engineering broad-spectrum disease resistance to biotrophic  
339 pathogens.

340 PBS1-based decoy engineering may be feasible in diverse crop species beyond  
341 soybean. *PBS1* is well conserved among flowering plants, with orthologs present in  
342 monocot and dicot crop plant species (Caldwell and Michelmore, 2009). Furthermore,  
343 AvrPphB has now been shown to cleave PBS1 orthologous proteins in soybean, barley,  
344 and wheat, and to activate immune responses in all three species (Sun *et al.*, 2017; Carter  
345 *et al.*, in press). In barley, this immune response is mediated by an NLR protein



346 designated PBR1 (Carter *et al.*, in press). Interestingly, PBR1 appears to have evolved  
347 independent from RPS5, thus the ability to recognize PBS1 cleavage has evolved at least  
348 twice in flowering plants, suggesting that selection to guard AvrPphB substrates occurs  
349 across species. It should thus be possible to introduce novel recognition specificities in  
350 most plant species that respond to AvrPphB using synthetic PBS1-based decoys.

351

## 352 **Materials and Methods**

### 353 **Plant Material and Growth Conditions**

354 *N. benthamiana* seeds were sown in plastic pots containing Pro-Mix B Biofungicide  
355 potting mix supplemented with Osmocote slow-release fertilizer (14-14-14) and grown  
356 under a 12-h photoperiod at 22°C in growth rooms with average light intensities at plant  
357 height of 150  $\mu\text{Einsteins m}^{-2} \text{s}^{-1}$

358 Seed for soybean (*Glycine max* (L.) Merr.) cultivars were ordered from the U.S.  
359 Department of Agriculture Soybean Germplasm Collection via the National Plant  
360 Germplasm System Web portal (<http://www.ars-grin.gov/npgs>). Soybean plants were  
361 sown in clay pots containing Pro-Mix B Biofungicide potting mix supplemented with  
362 Osmocote slow-release fertilizer (14-14-14) and grown in a growth chamber under a 16  
363 hr light/8 hr dark photoperiod at 23°C with average light intensities at plant height of 300  
364  $\mu\text{Einsteins m}^{-2} \text{s}^{-1}$ .

### 365 ***P. syringae* DC3000(D36E) in planta Assays**

366 Previously generated plasmids pVSP61-AvrPphB and pVSP61-AvrPphB(C98S) (a  
367 protease inactive derivative of AvrPphB) (Simonich and Innes, 1995; Shao *et al.*, 2003)  
368 were transformed into D36E, a derivative of *Pseudomonas syringae* pv. *tomato* DC3000



369 with all type III effector genes removed (Wei *et al.*, 2015). Bacteria were grown on King's  
370 medium B (KB), supplemented with rifampicin (100 µg/mL) and kanamycin (50 µg/mL),  
371 for two days at 30°C. Bacterial lawns of each strain were grown from single colonies  
372 selected on KB medium. *P. syringae* DC3000(D36E) strains were resuspended in 10 mM  
373 MgCl<sub>2</sub> to an optical density at 600 nm (OD<sub>600</sub>) of 0.2 for each strain. Bacterial suspensions  
374 were infiltrated into the abaxial surface of 14-day old primary leaves of soybean (cv.  
375 'Flambeau') seedlings using a 1-mL disposable needleless syringe. Responses were  
376 photographed two days after infiltration using a high intensity long-wave (365 nm)  
377 ultraviolet lamp (Black-Ray B-100AP, UVP, Upland, CA).

### 378 **Phylogenetic Analyses**

379 Soybean PBS1 (*GmPBS1*) and PBS1-like (*GmPBL*) homologs were identified by  
380 using the SoyBase genome browser (release Williams82.a2.v1; <http://soybase.org>)  
381 (Grant *et al.*, 2010) to search the soybean genome with Arabidopsis PBS1 and  
382 Arabidopsis PBS1-like proteins (PBL1 through PBL27) as queries. Twenty-two soybean  
383 protein sequences were identified as homologous to Arabidopsis PBS1. Amino acid  
384 alignments were made using MUSCLE with default parameters. Phylogenetic trees were  
385 generated for the collected sequences using the program MEGA7 under a neighbor  
386 joining model, and clades were assessed using 1,000 bootstrap repeats (Kumar *et al.*,  
387 2016).

### 388 **Plasmid Construction and Site-Directed Mutagenesis**

389 The AvrPphB:myc, AvrPphB(C98S):myc, and *AtPBS1*:HA constructs have been  
390 described previously (Shao *et al.*, 2003; Ade *et al.*, 2007; DeYoung *et al.*, 2012).  
391 Glyma.08G360600 (*GmPBS1-1*), Glyma.10G298400 (*GmPBS1-2*), and

392 Glyma.20G249600 (*GmPBS1-3*) were PCR amplified with *attB*-containing primers from  
393 soybean cv. 'Flambeau' cDNA and then sequenced (see Supplemental Table 1 for list of  
394 primers used). These cDNA sequences matched splice variants Glyma.08G360600.3,  
395 Glyma.10G298400.1 and Glyma.20G249600.2, respectively, and were also the most  
396 similar to *Arabidopsis PBS1* among the splice variants for each gene. The SMV *Nla*  
397 protease was PCR amplified from pSMV-34 (Ghabrial *et al.*, 1990) using primers  
398 designed to introduce *attB* sites. The resulting fragments were gel-purified using the  
399 QIAquick gel extraction kit (Qiagen), and recombined into the Gateway entry vector,  
400 pBSDONR(P1-P4) using the BP Clonase II kit (Invitrogen) (Qi *et al.*, 2012). The resulting  
401 constructs were sequence-verified to check for proper sequence and reading frame and  
402 subsequently designated pBSDONR(P1-P4):*GmPBS1-1*, pBSDONR(P1-P4):*GmPBS1-*  
403 *2*, pBSDONR(P1-P4):*GmPBS1-3*, and pBSDONR(P1-P4):*Nlapro*

404 To generate the *GmPBS1-1*<sup>SMV</sup>, *GmPBS1-2*<sup>SMV</sup>, *GmPBS1-3*<sup>SMV</sup>, *GmPBS1-1*<sup>5Ala</sup>,  
405 and *GmPBS1-2*<sup>5Ala</sup> derivatives, we used an established site-directed mutagenesis PCR  
406 protocol using pBSDONR(P1-P4):*GmPBS1-1*, pBSDONR(P1-P4):*GmPBS1-2*, and  
407 pBSDONR(P1-P4):*GmPBS1-3* as templates (Qi and Scholthof, 2008). The resulting  
408 constructs were sequence-verified and designated pBSDONR(P1-P4):*GmPBS1-1*<sup>SMV</sup>,  
409 pBSDONR(P1-P4):*GmPBS1-2*<sup>SMV</sup>, pBSDONR(P1-P4):*GmPBS1-3*<sup>SMV</sup>, pBSDONR(P1-  
410 P4):*GmPBS1-1*<sup>5Ala</sup>, and pBSDONR(P1-P4):*GmPBS1-2*<sup>5Ala</sup>.

411 To generate protein fusions with C-terminal epitope tags or fluorescent proteins,  
412 the pBSDONR(P1-P4):*GmPBS1-1*, pBSDONR(P1-P4):*GmPBS1-2*, pBSDONR(P1-  
413 P4):*GmPBS1-3*, pBSDONR(P1-P4):*GmPBS1-1*<sup>SMV</sup>, pBSDONR(P1-P4):*GmPBS1-2*<sup>SMV</sup>,  
414 and pBSDONR(P1-P4):*GmPBS1-3*<sup>SMV</sup> constructs were mixed with either the

415 pBSDONR(P4r-P2):3xHA or pBSDONR(P4r-P2):sYFP constructs and the Gateway-  
416 compatible expression vector pBAV154 [pBAV154 is a derivative of the destination vector  
417 pTA7001 and contains a dexamethasone inducible promoter; (Vinatzer *et al.*, 2006)] in a  
418 2:2:1 molar ratio. The pBSDONR(P1-P4):*Nlapro* construct was mixed with  
419 pBSDONR(P4r-P2):5xmyc and pBAV154 in a 2:2:1 molar ratio. Plasmids were  
420 recombined by the addition of LR Clonase II (Invitrogen) and incubated overnight at 25°C  
421 following the manufactures instructions. pBAV154-based DEX-inducible constructs were  
422 sequence verified and subsequently used for transient expression assays in *N.*  
423 *benthamiana* (Aoyama and Chua, 1997). The pBSDONR(P4r-P2):3xHA, pBSDONR(P4r-  
424 P2):5xmyc, and pBSDONR(P4r-P2):sYFP constructs have been described previously (Qi  
425 *et al.*, 2012).

426 The pKEx4tr:e.v., pKEx4tr:LUC, and pKEx4tr:AvrB constructs have been  
427 described previously (Chern *et al.*, 1996; Leister *et al.*, 1996; Tao *et al.*, 2000). To  
428 generate the pKEx4tr:AvrPphB and pKEx4tr:AvrPphB(C98S) constructs, *AvrPphB* and  
429 *AvrPphB(C98S)* were PCR-amplified using primers designed to introduce *BamHI* and  
430 *NotI* restriction sites at each end and the resulting PCR products were cloned into the  
431 *BamHI-NotI* site of pKEx4tr. To generate the pKEx4tr:*GmPBS1-1*, pKEx4tr:*GmPBS1-*  
432 *1<sup>5Ala</sup>*, pKEx4tr:*GmPBS1-1<sup>SMV</sup>*, pKEx4tr:*GmPBS1-2*, pKEx4tr:*GmPBS1-2<sup>5Ala</sup>*, and  
433 pKEx4tr:*Nlapro* constructs, *GmPBS1-1*, *GmPBS1-1<sup>5Ala</sup>*, *GmPBS1-1<sup>SMV</sup>*, *GmPBS1-2*,  
434 *GmPBS1-2<sup>5Ala</sup>*, and the *Nlapro* were PCR amplified using primers designed to introduce  
435 *XhoI* and *SacI* restriction sites and cloned into the *XhoI-SacI* site of pKEx4tr. The resulting  
436 constructs were sequence-verified to check for proper sequence and reading frame.

437 The pSMV-Nv::e.v. and pSMV-Nv::GFP constructs have been described  
438 previously (Wang *et al.*, 2006). To construct the pSMV-Nv::AvrPphB and pSMV-  
439 Nv::AvrPphB(C98S) clones, *AvrPphB* and *AvrPphB(C98S)* were PCR-amplified using  
440 primers designed to introduce an NlaI protease recognition site followed by an *AvrII*  
441 restriction site (Wang *et al.*, 2006). The resulting fragments were gel-purified using the  
442 QIAquick gel extraction kit (Qiagen), and subsequently introduced into the *AvrII* restriction  
443 site in pSMV-Nv (Fig. 3A). The resulting constructs were sequence-verified to check for  
444 proper sequence and reading frame.

#### 445 **Agrobacterium-mediated Transient Expression Assays in *N. benthamiana***

446 Transient expression assays were performed as previously described (DeYoung  
447 *et al.*, 2012; Kim *et al.*, 2016). Briefly, the dexamethasone-inducible constructs were  
448 mobilized into *A. tumefaciens* strain GV3101(pMP90) and streaked onto Luria-Bertani  
449 (LB) agar supplemented with gentamicin sulfate (30µg/mL) and kanamycin (50µg/mL).  
450 Single colonies were inoculated into 5 mL of liquid LB containing gentamicin sulfate  
451 (30µg/mL) and kanamycin (50µg/mL) and were shaken overnight at 30°C at 250rpm on  
452 a New Brunswick rotary shaker. After overnight culture, the bacterial cells were pelleted  
453 by centrifuging at 3,000xg for 3 minutes and resuspended in 10 mM MgCl<sub>2</sub> supplemented  
454 with 100 µM acteosyringone (Sigma-Aldrich). The bacterial suspensions were adjusted  
455 to an optical density at 600nm (OD<sub>600</sub>) of 0.3 prior to agroinfiltration and incubated for 3  
456 hours at room temperature. For co-expression of multiple constructs, the bacterial  
457 suspensions were mixed in equal ratios. Bacterial suspensions were infiltrated by  
458 needleless syringe into expanding leaves of 3-week-old *N. benthamiana*. Protein  
459 expression was induced 40 hours following agroinfiltration by spraying the leaves with 50

460  $\mu$ M dexamethasone supplemented with 0.02% Tween20. Samples were harvested for  
461 protein extraction at the indicated time points after dexamethasone application, flash-  
462 frozen in liquid nitrogen, and stored at  $-80^{\circ}\text{C}$ .

### 463 **Immunoblot Analyses of *N. benthamiana* Leaves**

464 For total protein extraction, frozen *N. benthamiana* leaf tissue (0.5g) was ground  
465 in two volumes of protein extraction buffer (150 mM NaCl, 50 mM Tris [pH 7.5], 0.1%  
466 Nonidet P-40 [Sigma-Aldrich], 1% plant protease inhibitor cocktail [Sigma-Aldrich], and  
467 1% 2,2'-dipyridyl disulfide [Chem-Impex]) using a cold ceramic mortar and pestle.  
468 Homogenates were centrifuged at 10,000xg for 10 minutes at  $4^{\circ}\text{C}$  to pellet debris. Eighty  
469 microliters of total protein lysate were combined with 20  $\mu\text{L}$  of 5X SDS loading buffer (250  
470 mM Tris-HCl [pH 6.8], 10% SDS (sodium dodecyl sulfate), 30% (v/v) glycerol, 0.05%  
471 bromophenol blue and 5%  $\beta$ -mercaptoethanol), and the mixture was boiled at  $95^{\circ}\text{C}$  for  
472 10 minutes. All samples were resolved on a 4-20% gradient Precise™ Protein Gels  
473 (Thermo Fisher Scientific, Waltham, MA) and separated at 180 V for 1 hour in 1X  
474 Tris/Glycine/SDS running buffer. Total proteins were transferred to a nitrocellulose  
475 membrane (GE Water and Process Technologies, Trevose, PA). Ponceau staining was  
476 used to confirm equal loading and transfer of protein samples. Membranes were washed  
477 with 1X Tris-buffered saline (TBS; 50 mM Tris-HCl, 150 mM NaCl, pH 7.5) solution  
478 containing 0.1% Tween 20 (TBST) and blocked with 5% Difco™ Skim Milk (BD, Franklin  
479 Lakes, NJ) for one hour at room temperature. Proteins were detected with 1:5,000 diluted  
480 peroxidase-conjugated anti-HA antibody (rat monoclonal, Roche, catalog number  
481 12013819001) and a 1:5,000 diluted peroxidase-conjugated anti-c-Myc antibody (mouse  
482 monoclonal, Thermo Fisher Scientific, catalog number MA1-81357) for 1 hour and

483 washed three times for 15 minutes in TBST solution. Protein bands were imaged using  
484 an Immuno-Star™ Reagents (Bio-Rad, Hercules, CA) and X-ray film.

#### 485 **Fluorescence Microscopy in *N. benthamiana***

486 Laser-scanning confocal microscopy assays were performed as previously  
487 described (Qi *et al.*, 2012). To image protein fusions in live *N. benthamiana* cells,  
488 microscopy was performed using an SP5 AOBS inverted confocal microscope (Leica  
489 Microsystems) equipped with a 63X numerical aperture 1.2 water objective. The sYFP  
490 fusion proteins were excited using a 514nm argon laser and fluorescence detected using  
491 a 522-to 545nm band-pass emission filter. mCherry fluorescence (excited with a 561nm  
492 helium-neon laser) was detected using a custom 595-to 620nm band-pass emission filter.

#### 493 **Soybean Protoplast Isolation and Transient Expression Assays**

494 Soybean protoplast isolation and transient expression assays were performed as  
495 described previously (Wu and Hanzawa, 2018) with minor modifications. Newly expanded  
496 unifoliate leaves from growth chamber (under a 16-h photoperiod at 22°C) grown 12-day-  
497 old soybean (cv. Williams 82) were cut into 0.5 – 1 millimeter leaf strips and gently  
498 immersed into an enzyme solution [(0.4 M Mannitol, 20 mM MES (pH 5.7), 20 mM KCl,  
499 2% (w/v) Cellulase R-10 (Yakult, catalog number 170221-01, Tokyo, Japan), 0.1% (w/v)  
500 Pectolyase Y-23 (Kyowa, catalog number Y-009, Osaka, Japan), 10 mM CaCl<sub>2</sub>, 0.1%  
501 (w/v) BSA, 0.5mM DTT) and incubated under vacuum pressure (25 mm Hg) for 30  
502 minutes. Following vacuum infiltration, the leaf strips were incubated in the enzyme  
503 solution for 6 hours in the dark at room temperature with gentle agitation (speed = 30, tilt  
504 = 1) on a 3-D Rotator Waver (VWR International). After adding 5 mL of W5 solution [(154  
505 mM NaCl, 125 mM CaCl<sub>2</sub>, 2 mM MES (pH 5.7), 5 mM KCl)], the enzyme/protoplast

506 solution was filtered through 75- $\mu$ m nylon mesh into a 50 mL round bottom tube. The  
507 protoplast cells were collected by centrifuging at 100xg for 3 minutes, washed once with  
508 W5 solution, and resuspended with MMG solution [(0.4 M Mannitol, 4 mM MES (pH 5.7),  
509 15 mM MgCl<sub>2</sub>)] to the final concentration at 10<sup>6</sup> mL<sup>-1</sup> on ice. Five hundred microliters of  
510 protoplast cells (5 × 10<sup>5</sup>) were aliquoted and mixed with 50  $\mu$ g of freshly prepared  
511 plasmids and 550  $\mu$ l of PEG solution [(40% (w/v) PEG4000, 200 mM Mannitol, 100 mM  
512 CaCl<sub>2</sub>)] for 15 minutes at room temperature incubation. To stop the transfection, the  
513 protoplast cells were washed with 2 mL of W5 solution and resuspended in 500  $\mu$ l of WI  
514 solution [(0.5 M Mannitol, 4 mM MES (pH 5.7), 20 mM KCl)]. After overnight incubation  
515 under low fluorescent light (4  $\mu$ mol m<sup>-2</sup> s<sup>-1</sup>) and room temperature conditions, the  
516 transfected protoplast cells were gently centrifuged (100xg for 3 minutes) and  
517 resuspended in 50  $\mu$ l of WI solution. Ten microliters of substrate solution (ViviRen, E6491,  
518 Promega) was mixed with the resuspended protoplasts and the luminescence signal from  
519 each sample was recorded using a BioTek Synergy HT plate reader.

## 520 **Introduction of SMV-Nv constructs into soybean**

521 The pSMV-Nv::*e.v.*, pSMV-Nv::*GFP*, pSMV-Nv::*AvrPphB*, and pSMV-  
522 Nv::*AvrPphB(C98S)* constructs were transformed into *Escherichia coli* TOP10 and  
523 streaked onto LB medium supplemented with carbenicillin (100  $\mu$ g/mL) and 20 mM  
524 glucose at 30°C. Single colonies were inoculated into 500 mL of liquid LB supplemented  
525 with carbenicillin (100  $\mu$ g/mL) and 20 mM glucose and shaken overnight at 30°C on a  
526 New Brunswick rotary shaker. After overnight culture, plasmid DNAs of pSMV-Nv::*e.v.*,  
527 pSMV-Nv::*GFP*, pSMV-Nv::*AvrPphB* and pSMV-Nv::*AvrPphB(C98S)* were prepared  
528 using the plasmid Maxiprep Kit (Qiagen).



529 Introduction of infectious pSMV-Nv and pSMV-Nv-based derivatives into soybean  
530 was performed as previously described (Seo *et al.*, 2009). Briefly, 10 µg of each infectious  
531 cDNA clone was diluted in 50 mM potassium phosphate (pH 7.5) to a total volume of 80  
532 µL and rub-inoculated with carborundum onto the abaxial surface of 14-day old primary  
533 leaves of soybean (cv. Flambeau) seedlings. Following mechanical inoculation, plants  
534 were maintained in a growth chamber under a 16 hr light/8 hr dark photoperiod at 23°C.  
535 Three weeks post-inoculation, the fourth trifoliolate leaflet was photographed under white  
536 light, flash frozen in liquid nitrogen, and stored at -80°C.

### 537 **Immunoblot Analysis of Soybean Leaves**

538 Immunoblot analyses were performed as described previously (Seo *et al.*, 2009).  
539 For total protein extraction, flash frozen fourth trifoliolate leaflets were ground in three  
540 volumes of protein extraction buffer (20 mM Tris-HCl [pH 7.5], 300 mM NaCl, 5mM MgCl<sub>2</sub>,  
541 5 mM dithiothreitol, 0.5% Triton X-100, 1% plant protease inhibitor cocktail [Sigma-  
542 Aldrich], and 1% 2,2'-dipyridyl disulfide [Chem-Impex]). Homogenates were centrifuged  
543 twice at 10,000xg for 10 minutes at 4°C to pellet debris. Total protein concentration was  
544 estimated by the Bradford assay (Bradford, 1976). Ten µg of total protein lysate was  
545 combined with 5X SDS loading buffer and the mixture was boiled at 95°C for 10 minutes.  
546 All samples were resolved on a 4-20% gradient Precise™ Protein Gels (Thermo Fisher  
547 Scientific, Waltham, MA) and separated at 185 V for 1 hour in 1X Tris/Glycine/SDS  
548 running buffer. Total proteins were transferred to a nitrocellulose membrane (GE Water  
549 and Process Technologies, Trevose, PA). Ponceau staining was used to confirm equal  
550 loading and transfer of protein samples. Membranes were washed with 1X Tris-buffered  
551 saline (TBS; 50 mM Tris-HCl, 150 mM NaCl, pH 7.5) solution containing 0.1% Tween 20



552 (TBST) and blocked with 5% Difco™ Skim Milk (BD, Franklin Lakes, NJ) overnight at 4°C.  
553 Nitrocellulose membranes were incubated with either 1:5,000 monoclonal mouse anti-  
554 GFP antibody (Novus Biologicals, catalog number NB600-597, Littleton, CO), 1:5,000  
555 polyclonal rabbit anti-AvrPphB antisera, or 1:10,000 polyclonal rabbit anti-SMV-CP (SMV  
556 coat protein) antibody (Hunst and Tolin, 1982) for one hour at room temperature and  
557 washed overnight in TBST solution at 4°C. Proteins were detected with either 1:5,000  
558 horseradish peroxidase-conjugated goat anti-mouse antibody (abcam, catalog number  
559 ab6789, Cambridge, MA) or 1:5,000 peroxidase-conjugated goat anti-rabbit antibody  
560 (abcam, catalog number ab205718, Cambridge, MA) for one hour at room temperature.  
561 The nitrocellulose membranes were washed three times for 15 minutes in TBST solution  
562 and protein bands were imaged using an Immuno-Star™ Reagents (Bio-Rad, Hercules,  
563 CA) or Supersignal® West Femto Maximum Sensitivity Substrates (Thermo Scientific,  
564 Waltham, MA) and X-ray film.

565

## 566 **Acknowledgements**

567 The authors thank Alan Eggenberger and John Hill for generously providing the pSMV-  
568 Nv and pSMV-Nv::*GFP* plasmids; Said Ghabriel for supplying the pSMV-34 plasmid; Sue  
569 Tolin for kindly providing antibody for the SMV coat protein (SMV-CP); Alexandra Margets  
570 and Leina Joseph for technical laboratory assistance; the Indiana University Light  
571 Microscopy Imaging Center; Morgan Carter and Brody DeYoung for helpful discussions  
572 and critical reading of the manuscript; and the U.S. Department of Agriculture Soybean  
573 Germplasm Collection for soybean seed. This work was supported by the National  
574 Science Foundation Integrative Organismal Systems grant awarded to RWI and SAW

575 (grant no. IOS-1551452) and by funding from BASF Plant Science. MH was supported by  
576 a USDA-AFRI predoctoral fellowship.

577

578 **References**

- 579 Adams, M.J., Antoniw, J.F., and Beaudoin, F. 2005. Overview and analysis of the  
580 polyprotein cleavage sites in the family Potyviridae. *Mol. Plant Pathol.* 6:471-487.
- 581 Ade, J., DeYoung, B.J., Golstein, C., and Innes, R.W. 2007. Indirect activation of a plant  
582 nucleotide binding site–leucine-rich repeat protein by a bacterial protease. *Proc.*  
583 *Natl. Acad. Sci. USA* 104:2531-2536.
- 584 Aoyama, T., and Chua, N.H. 1997. A glucocorticoid-mediated transcriptional induction  
585 system in transgenic plants. *Plant J.* 11:605-612.
- 586 Ashfield, T., Ong, L.E., Nobuta, K., Schneider, C.M., and Innes, R.W. 2004. Convergent  
587 evolution of disease resistance gene specificity in two flowering plant families.  
588 *Plant Cell* 16:309-318.
- 589 Bradford, M.M. 1976. A rapid and sensitive method for the quantitation of microgram  
590 quantities of protein utilizing the principle of protein-dye binding. *Anal. Biochem.*  
591 72:248-254.
- 592 Caldwell, K.S., and Michelmore, R.W. 2009. *Arabidopsis thaliana* genes encoding  
593 defense signaling and recognition proteins exhibit contrasting evolutionary  
594 dynamics. *Genetics* 181:671-684.
- 595 Carter, M.E., Helm, M., Chapman, A.V.E., Wan, E., Restrepo-Sierra, A.M., Innes, R.W.,  
596 Bogdanove, A.J., and Wise, R.P. in press. Convergent evolution of effector

- 597 protease recognition by Arabidopsis and barley. *Mol. Plant-Microbe Interact.* In  
598 press.
- 599 Chern, M.S., Bobb, A.J., and Bustos, M.M. 1996. The regulator of MAT2 (ROM2)  
600 protein binds to early maturation promoters and represses PvALF-activated  
601 transcription. *Plant Cell* 8:305-321.
- 602 Clark, A.J., and Perry, K.L. 2002. Transmissibility of field isolates of soybean viruses by  
603 *Aphis glycines*. *Plant Dis.* 86:1219-1222.
- 604 DeYoung, B.J., Qi, D., Kim, S.-H., Burke, T.P., and Innes, R.W. 2012. Activation of a  
605 plant nucleotide binding-leucine rich repeat disease resistance protein by a  
606 modified self protein. *Cell Microbiol.* 14:1071-1084.
- 607 Ghabrial, S.A., Smith, H.A., Parks, T.D., and Dougherty, W.G. 1990. Molecular genetic  
608 analyses of the soybean mosaic virus NIa proteinase. *J Gen. Virol.* 71:1921-  
609 1927.
- 610 Grant, D., Nelson, R.T., Cannon, S.B., and Shoemaker, R.C. 2010. SoyBase, the  
611 USDA-ARS soybean genetics and genomics database. *Nucleic Acids Res.*  
612 38:D843-D846.
- 613 Giannakopoulou, A., Steele, J.F.C., Segretin, M.E., Bozkurt, T.O., Zhou, J., Robatzek,  
614 S., Banfield, M.J., Pais, M., and Kamoun, S. 2015. Tomato I2 immune receptor  
615 can be engineered to confer partial resistance to the oomycete *Phytophthora*  
616 *infestans* in addition to the fungus fusarium oxysporum. *Mol. Plant-Microbe*  
617 *Interact.* 28:1316-1329.

- 618 Hajimorad, M.R., Domier, L.L., Tolin, S.A., Whitham, S.A., and Saghai Maroof, M.A.  
619 2018. Soybean mosaic virus: a successful potyvirus with a wide distribution but  
620 restricted natural host range. *Mol. Plant Pathol.* 19:1563-1579.
- 621 Harris, C.J., Sloatweg, E.J., Goverse, A., and Baulcombe, D.C. 2013. Stepwise artificial  
622 evolution of a plant disease resistance gene. *Proc. Natl. Acad. Sci. USA*  
623 110:21189-21194.
- 624 Hartman, G., Domier, L., Wax, L., Helm, C., Onstad, D., Shaw, J., Solter, L., Voegtlin,  
625 D., D'Arcy, C., and Gray, M.J.P.H.P. 2001. Occurrence and distribution of *Aphis*  
626 *glycines* on soybeans in Illinois in 2000 and its potential control. *Plant Health*  
627 *Prog.* 2:17.
- 628 He, P., Shan, L., and Sheen, J. 2007. The use of protoplasts to study innate immune  
629 responses. *Methods Mol. Biol.* 354:1-9.
- 630 Hill, J.H., Alleman, R., Hogg, D.B., and Grau, C.R. 2001. First report of transmission of  
631 Soybean mosaic virus and Alfalfa mosaic virus by *Aphis glycines* in the new  
632 world. *Plant Dis.* 85:561-561.
- 633 Hunst, P.L., and Tolin, S.A. 1982. Isolation and comparison of two strains of Soybean  
634 mosaic virus. *Phytopathology* 72:710-713.
- 635 Jayaram, C., Hill, J.H., and Miller, W.A. 1992. Complete nucleotide sequences of two  
636 Soybean mosaic virus strains differentiated by response of soybean containing  
637 the *Rsv* resistance gene *J Gen. Virol.* 73:2067-2077.
- 638 Kim, H., Kim, S.-T., Ryu, J., Kang, B.-C., Kim, J.-S., and Kim, S.-G. 2017.  
639 CRISPR/Cpf1-mediated DNA-free plant genome editing. *Nat. Commun.* 8:14406.

- 640 Kim, S.H., Qi, D., Ashfield, T., Helm, M., and Innes, R.W. 2016. Using decoys to expand  
641 the recognition specificity of a plant disease resistance protein. *Science* 351:684-  
642 687.
- 643 Kumar, S., Stecher, G., and Tamura, K. 2016. MEGA7: Molecular Evolutionary Genetics  
644 Analysis Version 7.0 for Bigger Datasets. *Mol. Biol. Evol.* 33:1870-1874.
- 645 Leister, R.T., Ausubel, F.M., and Katagiri, F. 1996. Molecular recognition of pathogen  
646 attack occurs inside of plant cells in plant disease resistance specified by the  
647 *Arabidopsis* genes *RPS2* and *RPM1*. *Proc. Natl. Acad. Sci. USA* 93:15497-  
648 15502.
- 649 Libault, M., Farmer, A., Joshi, T., Takahashi, K., Langley, R.J., Franklin, L.D., He, J.,  
650 Xu, D., May, G., and Stacey, G. 2010. An integrated transcriptome atlas of the  
651 crop model *Glycine max*, and its use in comparative analyses in plants. *Plant J.*  
652 63:86-99.
- 653 Maqbool, A., Saitoh, H., Franceschetti, M., Stevenson, C.E., Uemura, A., Kanzaki, H.,  
654 Kamoun, S., Terauchi, R., and Banfield, M.J. 2015. Structural basis of pathogen  
655 recognition by an integrated HMA domain in a plant NLR immune receptor. *eLife*  
656 4.
- 657 Qi, D., and Scholthof, K.B. 2008. A one-step PCR-based method for rapid and efficient  
658 site-directed fragment deletion, insertion, and substitution mutagenesis. *J Virol.*  
659 *Methods* 149:85-90.
- 660 Qi, D., DeYoung, B.J., and Innes, R.W. 2012. Structure-function analysis of the coiled-  
661 coil and leucine-rich repeat domains of the *RPS5* disease resistance protein.  
662 *Plant Physiol.* 158:1819-1832.

- 663 Qi, D., Dubiella, U., Kim, S.H., Sloss, D.I., Downen, R.H., Dixon, J.E., and Innes, R.W.  
664 2014. Recognition of the protein kinase AVRPPHB SUSCEPTIBLE1 by the  
665 disease resistance protein RESISTANCE TO PSEUDOMONAS SYRINGAE5 is  
666 dependent on S-acylation and an exposed loop in AVRPPHB SUSCEPTIBLE1.  
667 Plant Physiol. 164:340-351.
- 668 Russell, A.R., Ashfield, T., and Innes, R.W. 2015. *Pseudomonas syringae* effector  
669 AvrPphB suppresses AvrB-induced activation of RPM1 but not AvrRpm1-induced  
670 activation. Mol. Plant-Microbe Interact. 28:727-735.
- 671 Segretin, M.E., Pais, M., Franceschetti, M., Chaparro-Garcia, A., Bos, J.I.B., Banfield,  
672 M.J., and Kamoun, S. 2014. Single amino acid mutations in the potato immune  
673 receptor R3a expand response to Phytophthora effectors. Mol. Plant-Microbe  
674 Interact. 27:624-637.
- 675 Seo, J.K., Lee, H.G., and Kim, K.H. 2009. Systemic gene delivery into soybean by  
676 simple rub-inoculation with plasmid DNA of a Soybean mosaic virus-based  
677 vector. Arch. Virol. 154:87-99.
- 678 Shao, F., Golstein, C., Ade, J., Stoutemyer, M., Dixon, J.E., and Innes, R.W. 2003.  
679 Cleavage of *Arabidopsis* PBS1 by a bacterial type III effector. Science 301:1230-  
680 1233.
- 681 Simonich, M.T., and Innes, R.W. 1995. A disease resistance gene in *Arabidopsis* with  
682 specificity for the *avrPph3* gene of *Pseudomonas syringae* pv. *phaseolicola*. Mol.  
683 Plant-Microbe Interact. 8:637-640.
- 684 Stirnweis, D., Milani, S.D., Jordan, T., Keller, B., and Brunner, S. 2014. Substitutions of  
685 two amino acids in the nucleotide-binding site domain of a resistance protein

- 686           enhance the hypersensitive response and enlarge the PM3F resistance spectrum  
687           in wheat. *Mol. Plant-Microbe Interact.* 27:265-276.
- 688 Sun, J., Huang, G., Fan, F., Wang, S., Zhang, Y., Han, Y., Zou, Y., and Lu, D. 2017.  
689           Comparative study of Arabidopsis PBS1 and a wheat PBS1 homolog helps  
690           understand the mechanism of PBS1 functioning in innate immunity. *Sci. Rep.*  
691           7:5487.
- 692 Sun, X., Hu, Z., Chen, R., Jiang, Q., Song, G., Zhang, H., and Xi, Y. 2015. Targeted  
693           mutagenesis in soybean using the CRISPR-Cas9 system. *Sci. Rep.* 5:10342.
- 694 Tao, Y., Yuan, F., Leister, R.T., Ausubel, F.M., and Katagiri, F. 2000. Mutational  
695           analysis of the Arabidopsis nucleotide binding site-leucine-rich repeat resistance  
696           gene *RPS2*. *Plant Cell* 12:2541-2554.
- 697 Tobias, C.M., Oldroyd, G.E.D., Chang, J.H., and Staskawicz, B.J. 1999. Plants  
698           expressing the *Pto* disease resistance gene confer resistance to recombinant  
699           PVX containing the avirulence gene *AvrPto*. *Plant J.* 17:41-50.
- 700 Vinatzer, B.A., Teitzel, G.M., Lee, M.-W., Jelenska, J., Hotton, S., Fairfax, K., Jenrette,  
701           J., and Greenberg, J.T. 2006. The type III effector repertoire of *Pseudomonas*  
702           *syringae* pv. *syringae* B728a and its role in survival and disease on host and non-  
703           host plants. *Mol. Microbiol.* 62:26-44.
- 704 Wang, L., Eggenberger, A., Hill, J., and Bogdanove, A.J. 2006. *Pseudomonas syringae*  
705           effector *AvrB* confers soybean cultivar-specific avirulence on Soybean mosaic  
706           virus adapted for transgene expression but effector *AvrPto* does not. *Mol. Plant-*  
707           *Microbe Interact.* 19:304-312.

- 708 Wei, H.-L., Chakravarthy, S., Mathieu, J., Helmann, Tyler C., Stodghill, P., Swingle, B.,  
709 Martin, Gregory B., and Collmer, A. 2015. *Pseudomonas syringae* pv. *tomato*  
710 DC3000 type III secretion effector polymutants reveal an interplay between  
711 HopAD1 and AvrPtoB. *Cell Host Microbe* 17:752-762.
- 712 Whitham, S.A., Qi, M., Innes, R.W., Ma, W., Lopes-Caitar, V., and Hewezi, T. 2016.  
713 Molecular soybean-pathogen interactions. *Annu. Rev. Phytopathol.* 54:443-468.
- 714 Wu, F., and Hanzawa, Y. 2018. A simple method for isolation of soybean protoplasts  
715 and application to transient gene expression analyses. *J Vis Exp*: (131), e57258,  
716 doi:10.3791/57258.
- 717 Zhang, J., Li, W., Xiang, T., Liu, Z., Laluk, K., Ding, X., Zou, Y., Gao, M., Zhang, X.,  
718 Chen, S., Mengiste, T., Zhang, Y., and Zhou, J.-M. 2010. Receptor-like  
719 cytoplasmic kinases integrate signaling from multiple plant immune receptors and  
720 are targeted by a *Pseudomonas syringae* effector. *Cell Host Microbe* 7:290-301.  
721



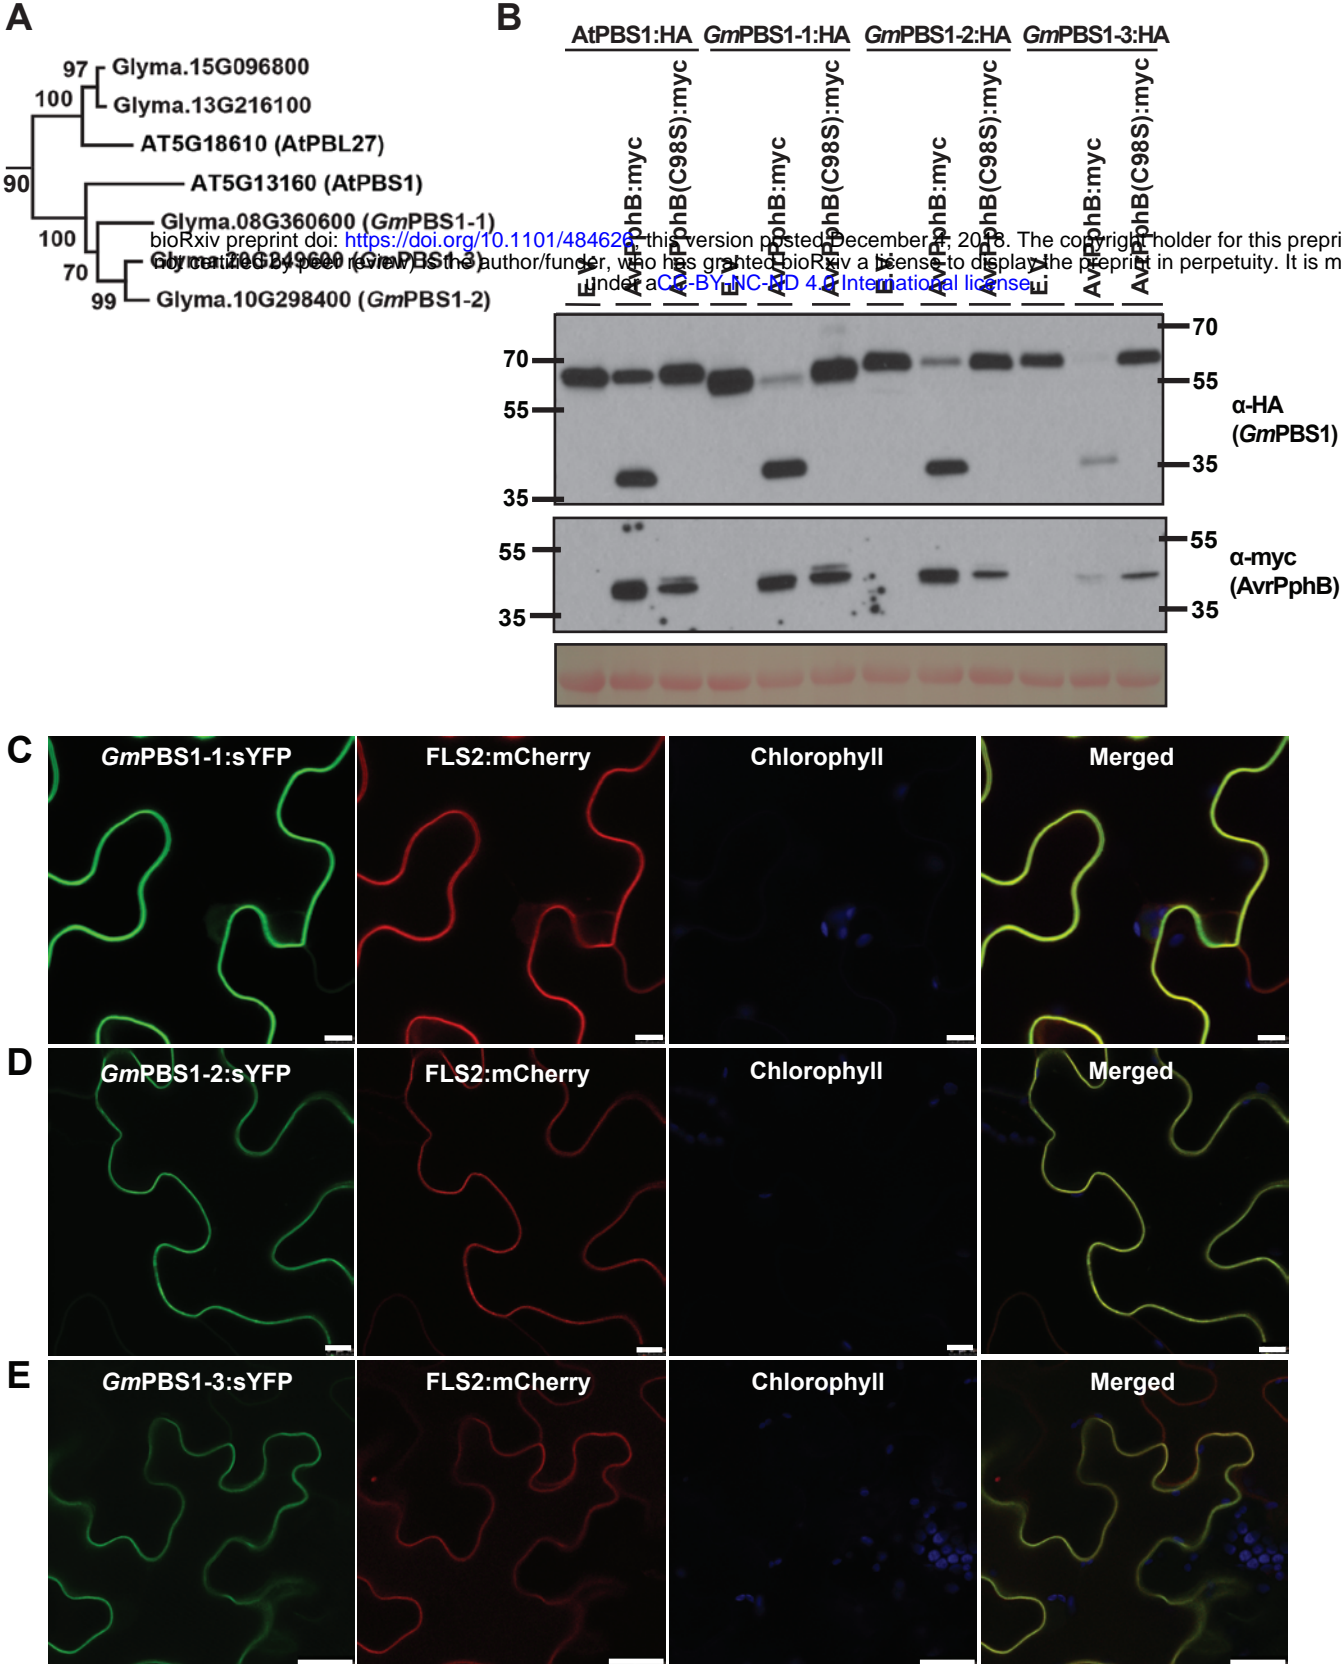

**Figure 1. Soybean contains three PBS1 proteins that localize to the plasma membrane and are cleaved by AvrPphB.** A) Glyma.08G360600.3 (*GmPBS1-1*), Glyma.10G298400.1 (*GmPBS1-2*), and Glyma.20G249600.2 (*GmPBS1-3*) are co-orthologous to Arabidopsis PBS1 (*AtPBS1*). Shown is a phylogenetic tree generated from the amino acid sequences of Arabidopsis PBS1 and the most closely related soybean homologs using MEGA7 with the neighbor joining model (Kumar et al., 2016). The bootstrap values are shown at the nodes. This tree is a subset of Supplemental Figure 2, which displays soybean proteins closely related to Arabidopsis PBS1 and Arabidopsis PBS1-like (*AtPBL*) proteins. B) Cleavage of *GmPBS1-1*, *GmPBS1-2*, and *GmPBS1-3* by AvrPphB. HA-tagged soybean PBS1 homologs or Arabidopsis PBS1 were transiently co-expressed with or without myc-tagged AvrPphB and AvrPphB(C98S) in *N. benthamiana*. Total protein was extracted six hours post-transgene induction and immunoblotted with the indicated antibodies. Ponceau S solution staining was included as a control to show equal loading of protein samples. Three independent experiments were performed with similar results. The results of only one experiment are shown. (C-E) The soybean PBS1 proteins localize to the plasma membrane (PM) in *N. benthamiana*. C) sYFP-tagged Glyma.08G360600.3 (*GmPBS1-1*), D) Glyma.10G298400.1 (*GmPBS1-2*), and E) Glyma.20G249600.2 (*GmPBS1-3*) and mCherry-tagged *FLS2* were transiently co-expressed in *N. benthamiana* leaves. Live-cell imaging was performed using laser-scanning confocal microscopy 24 hours following transgene induction. *FLS2* was included as a reference for plasma membrane localization. Scale bars = 10  $\mu$ m, except in C, in which the bar = 25  $\mu$ m. Two independent experiments were performed with similar results. The results of only one experiment are shown.

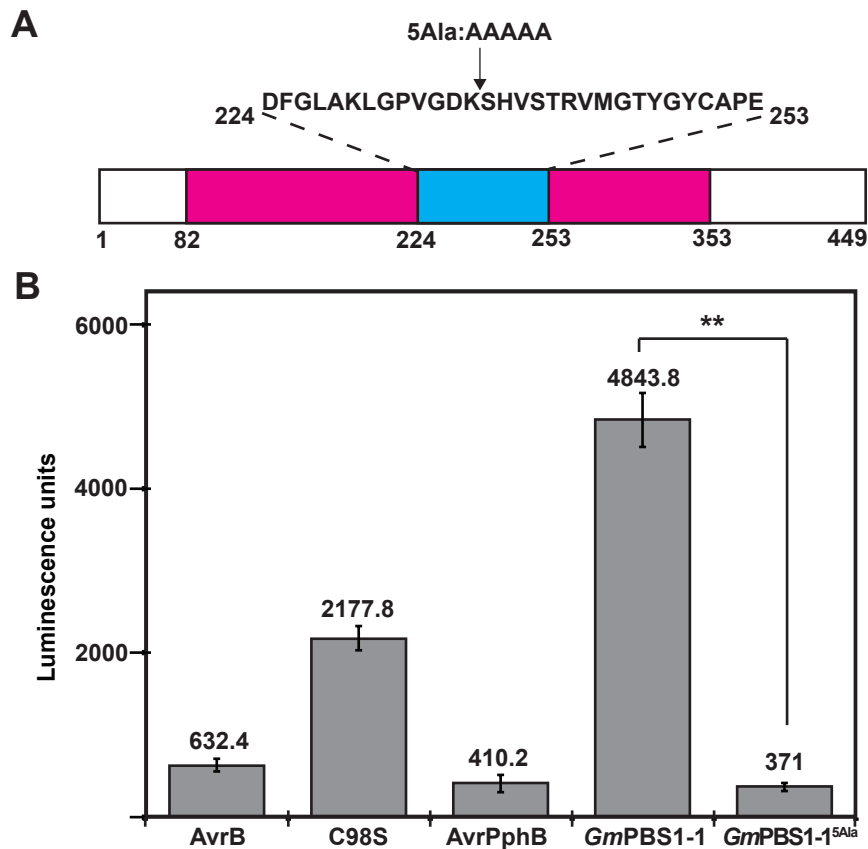

**Figure 2. Transient expression of the *GmPBS1-1*<sup>5Ala</sup> derivative activates cell death in soybean (cv. Williams 82).** A) Schematic illustration of the synthetic *GmPBS1-1*<sup>5Ala</sup> construct. The predicted kinase domain (amino acids 82-353) and activation segment (amino acids 224-253) of *GmPBS1-1* are represented by a magenta box and a cyan blue box, respectively. The amino acid sequence of the activation segment and the location of the five-alanine insertion are indicated above. B) Transient expression of the *GmPBS1-1*<sup>5Ala</sup> derivative activates cell death in soybean protoplasts. The indicated constructs were transiently co-expressed along with *Renilla* Luciferase in soybean (cv. Williams 82) protoplasts. Values represent the mean ± S.D. for two technical replicates. T-tests were performed for the pair-wise comparison. The double asterisk indicates significant difference ( $p < 0.01$ ). Three independent experiments were performed with similar results. The results of one experiment are shown.

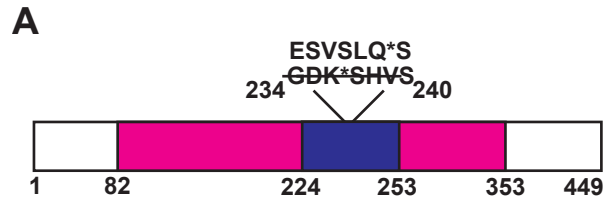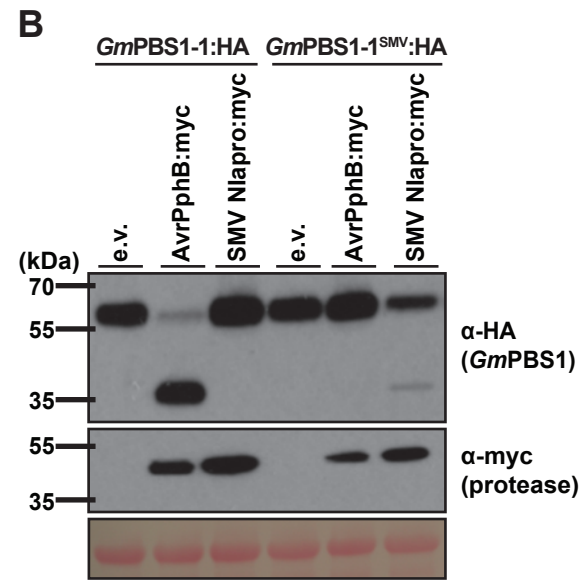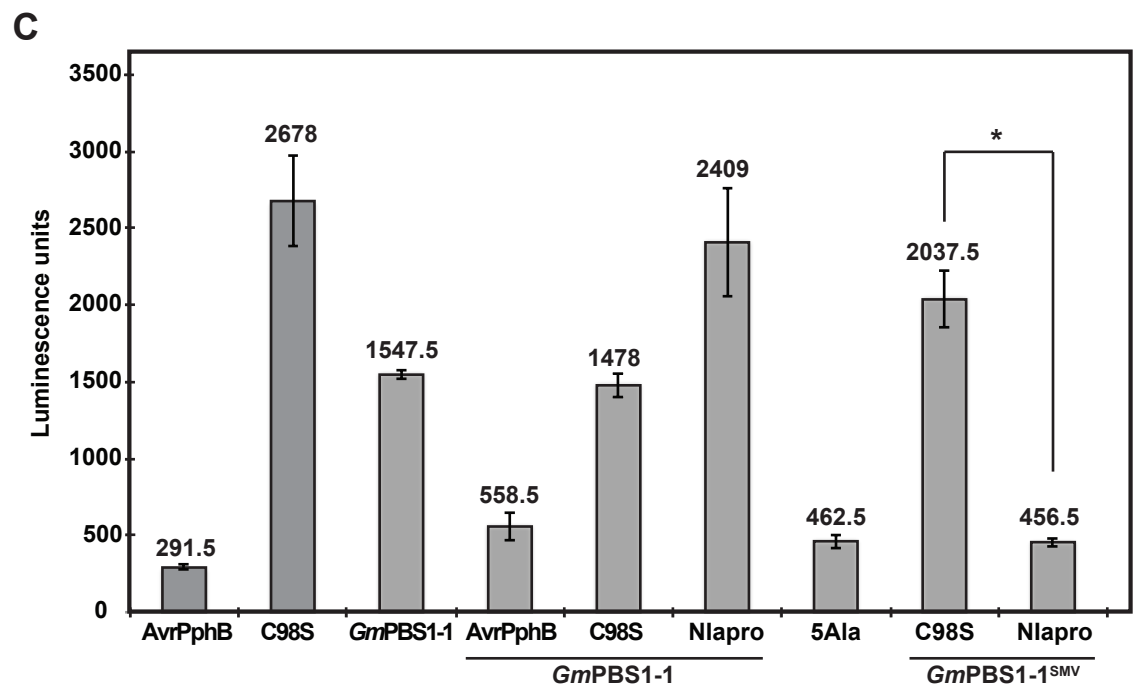

**Figure 3. SMV Nla-mediated cleavage of the *GmPBS1-1<sup>SMV</sup>* decoy activates cell death in soybean cv. Williams 82.** A) Schematic representation of the synthetic *GmPBS1-1<sup>SMV</sup>* decoy. The endogenous AvrPphB cleavage site in *GmPBS1-1* (GDKSHVS) was substituted with the cleavage site sequence recognized by the SMV Nla protease (ESVSLQS). The asterisks indicate the location of cleavage by the respective proteases within the recognition sites. B) Cleavage of the *GmPBS1-1<sup>SMV</sup>* synthetic decoy protein by the SMV Nla protease. HA-tagged *GmPBS1-1<sup>SMV</sup>* or *GmPBS1-1* were transiently co-expressed with either empty vector (e.v.), AvrPphB:myc, or SMV Nlapro:myc in *N. benthamiana*. Total protein was extracted nine hours post-transgene induction and immunoblotted with the indicated antibodies. Ponceau S solution staining was included as a control to show equal loading of protein samples. Three independent experiments were performed with similar results. The results of only one experiment are shown. C) Cleavage of the *GmPBS1-1<sup>SMV</sup>* decoy by the Nla protease activates cell death in soybean protoplasts. The indicated constructs were transiently co-expressed along with *Renilla* Luciferase in soybean (cv. Williams 82) protoplasts. Values represent the mean  $\pm$  S.D. for two technical replicates. T-tests were performed for the pair-wise comparison. The asterisk indicates significant difference ( $p < 0.05$ ). Two independent experiments were performed with similar results. The results of one experiment are shown.

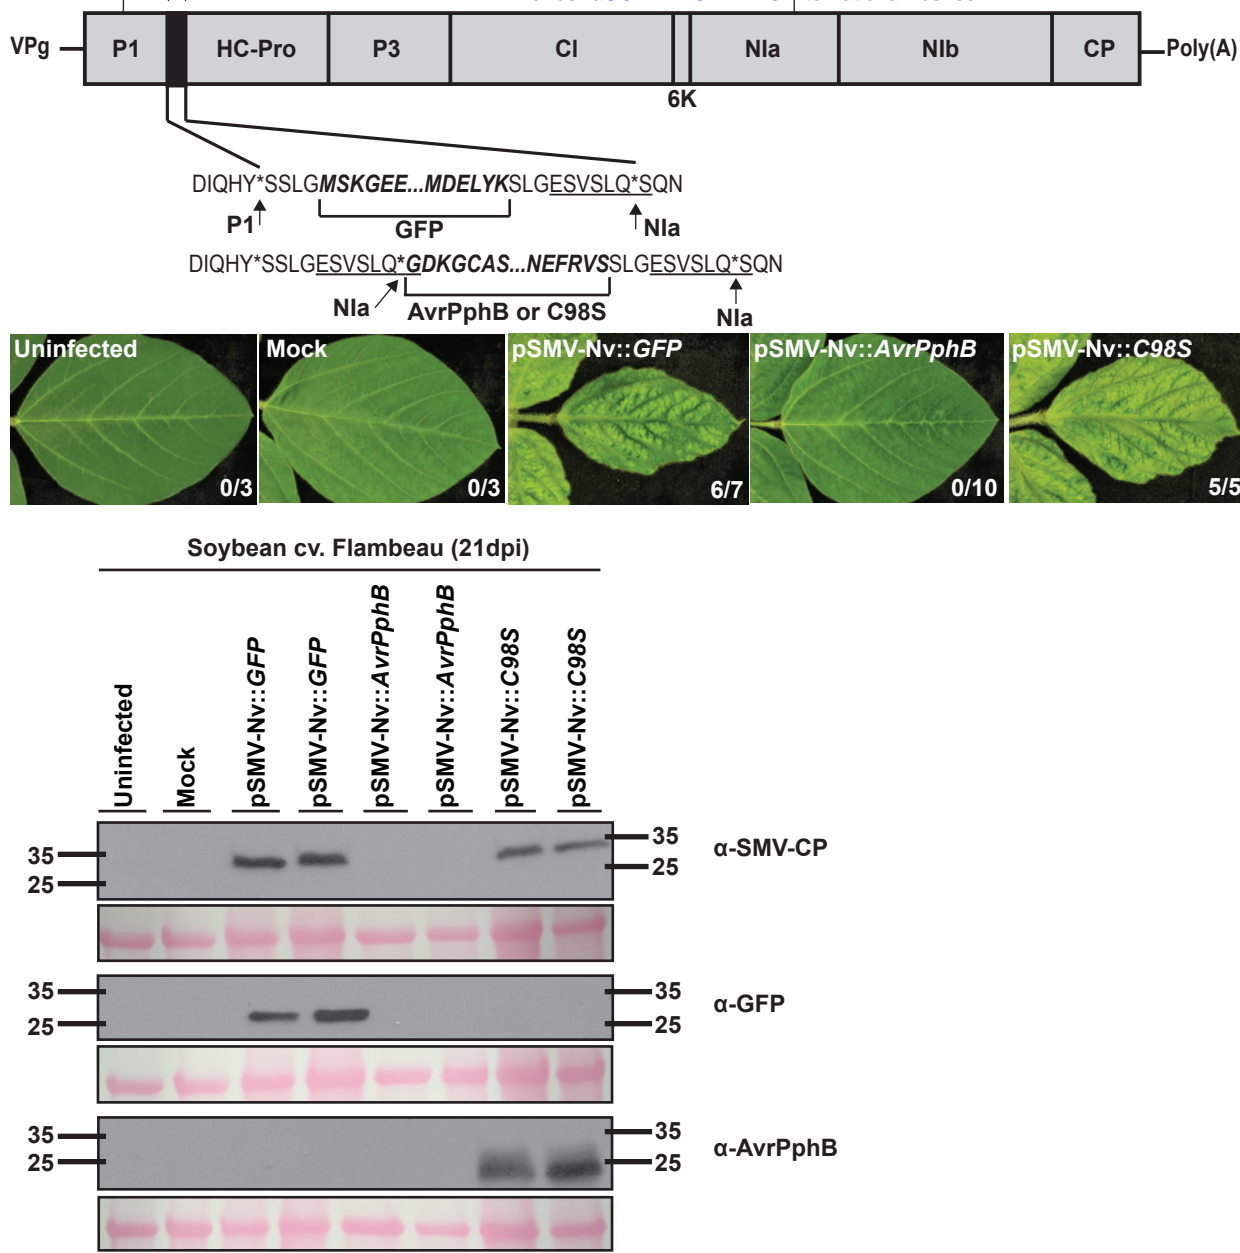

**Figure 4. Recognition of AvrPphB protease activity in soybean blocks SMV symptom development and viral protein accumulation in systemic, uninoculated trifoliolate leaflets.** A) Schematic representation of the SMV-based transient expression system used in this study (adapted from Wang et al., 2006). The grey boxes represent SMV-Nv cistrons. The shaded black box indicates the location of transgene insertion. Arrows indicate the positions of the P1 and N1a protease cleavage sites within the SMV-Nv polyprotein. Cleavage by the P1 and the N1a proteases at the respective cleavage sites (indicated by the arrows) releases GFP, AvrPphB, or AvrPphB(C98S) from the SMV polyprotein. The SMV N1a protease recognition site is underlined. B) Recognition of AvrPphB protease activity in soybean (cv. Flambeau) inhibits SMV movement into uninoculated trifoliolate leaflets. Fourteen-day-old soybean (cv. Flambeau) primary leaves were rub-inoculated with either mock (buffer) or 35S-driven infectious cDNAs of strain SMV-Nv expressing GFP (pSMV-Nv::GFP), AvrPphB (pSMV-Nv::AvrPphB), or AvrPphB(C98S) (pSMV-Nv::C98S). Three weeks post-inoculation, the fourth trifoliolate leaflet was photographed under white light. The numbers on the right bottom of the photographs indicate the sum of trifoliolate leaflets displaying viral symptoms consistent with SMV infection/total number of plants rub-inoculated with infectious cDNAs. Two independent experiments were performed with similar results. The results of only one experiment are shown. C) Western blot analysis shows SMV coat protein (SMV-CP) accumulation in the systemic trifoliolate leaflets of soybean (cv. Flambeau) inoculated with pSMV-Nv::GFP and pSMV-Nv::C98S and not pSMV-Nv::AvrPphB. Three weeks post-inoculation, the fourth trifoliolate leaflet was flash frozen in liquid nitrogen, total protein extracted, and protein concentration estimated by Bradford (1976) assay. Ten micrograms of total protein was separated on 4–20% gradient Precise™ Protein Gels and immunoblotted with the indicated antibodies. Lanes with duplicate labels indicate independent biological replicates. Ponceau S solution staining was included as a control to show equal loading of protein samples. Two independent experiments were performed with similar results. The results of one experiment are shown.

**A**

White light

UV light

Soybean cv. 'Flambeau' (24hpi)

AvrPphB(C98S)

mock

AvrPphB

e.v.

**Supplemental Figure 1. Soybean recognizes AvrPphB protease activity.** Response of soybean (cv. Flambeau) to *Pseudomonas syringae* pv. *tomato* DC3000 (D36E) expressing empty vector (e.v.), AvrPphB, or a catalytically inactive mutant of AvrPphB [(AvrPphB(C98S))]. Bacterial suspensions ( $OD_{600} = 0.2$ ) were infiltrated into the abaxial surface of primary leaves (14-day-old) using a 1-mL disposable syringe. The leaf surface was nicked with a sterile razor blade prior to infiltration. The perimeter of the infiltrated region is indicated with a permanent marker. Photographs were taken twenty-four hours post-inoculation (24hpi) under white light and UV light. A representative leaf is shown. At least five plants were infiltrated with each strain over two repeats.



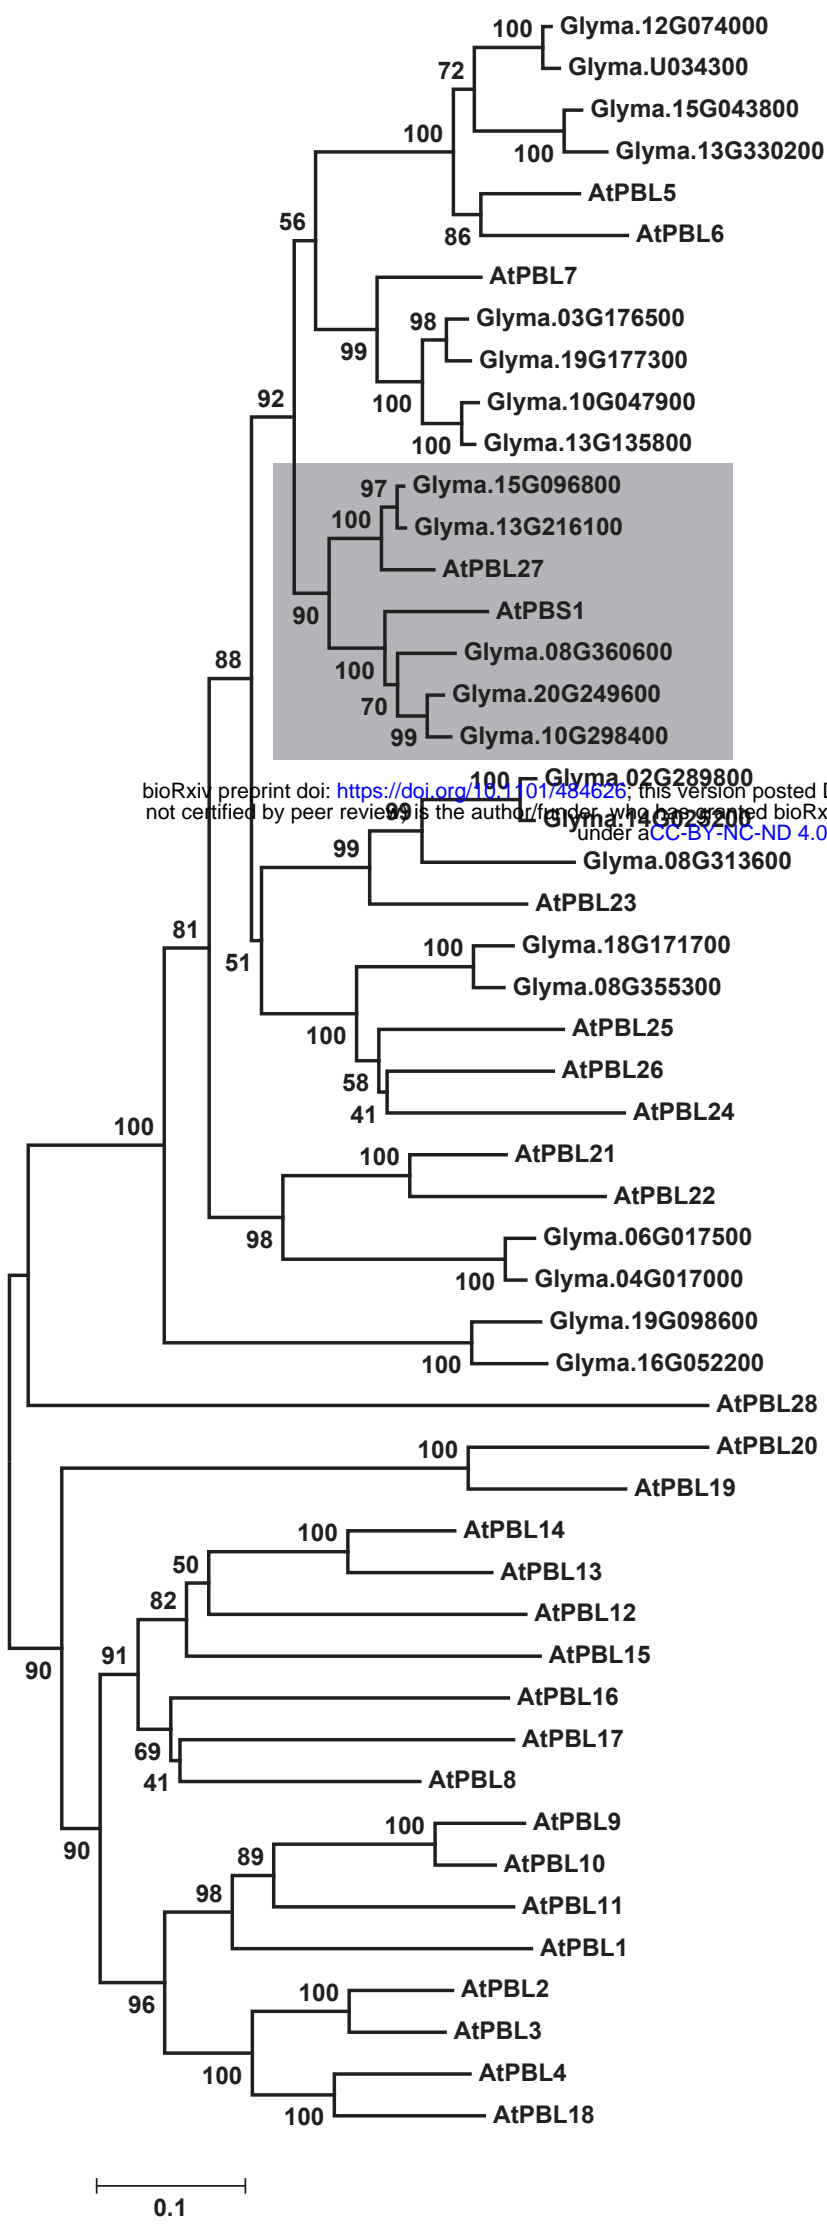

**Supplemental Figure 2. Neighbor-joining phylogenetic tree based on amino acid alignment of full-length products of Arabidopsis *PBS1* (*AtPBS1*), all characterized Arabidopsis *PBS1*-like (*AtPBL*) genes, and soybean *PBS1*-like (*GmPBL*) genes homologous to Arabidopsis *PBS1*.** *AtPBS1* and *AtPBL* sequences were obtained from The Arabidopsis Information Resource (TAIR10) website (arabidopsis.org; Carter et al., in press). Homology searches were performed using the SoyBase genome browser (release Williams82.a2.v1; <http://soybase.org>) (Grant et al., 2010) to identify soybean amino acid sequences homologous to Arabidopsis *PBS1*. Twenty-two soybean protein sequences were identified as homologous to Arabidopsis *PBS1*. Amino acid alignments were made using MUSCLE with default parameters. The phylogenetic tree was generated for the collected sequences using MEGA7 with the neighbor joining model, and clades were assessed using 1,000 bootstrap repeats (Kumar et al., 2016) (Sun et al., 2017) (Carter et al., in press). The bootstrap values are shown at the nodes. The scale bar indicates amino acid substitutions per site. The gray box highlights the clade presented in Figure 1.

|          |     |        |        |        |        |        |        |        |         |        |       |       |        |       |       |       |       |       |      |     |   |      |         |         |
|----------|-----|--------|--------|--------|--------|--------|--------|--------|---------|--------|-------|-------|--------|-------|-------|-------|-------|-------|------|-----|---|------|---------|---------|
| AtPBS1   | 1   | MGCFS  | CFDSS  | DDEKLN | PNVDES | NHGQ   | --K--  | --KQSQ | PTVSN   | NISGL  | PLPS  | ---G  | -----  | GE    |       |       |       |       |      |     |   |      |         |         |
| GmPBS1-1 | 1   | MGCFS  | CFDSS  | SKEDHN | LRPQH  | PNQ    | -----  | PLPS   | QISRL   | PS     | ---G  | ----- | AD     |       |       |       |       |       |      |     |   |      |         |         |
| GmPBS1-2 | 1   | MGCFS  | CFDSR  | EDEMLN | PNPQ   | QENHH  | HEHEH  | DHDLK  | PPVPS   | RISR   | LP    | PSASG | -----  | D     |       |       |       |       |      |     |   |      |         |         |
| GmPBS1-3 | 1   | MGCFS  | CFDSR  | EDEKLN | PNPQ   | QENHQ  | HEHEH  | EHD    | LKPPV   | PSRISR | LP    | PSASA | SASASV | GAD   |       |       |       |       |      |     |   |      |         |         |
| AtPBS1   | 46  | KLSSK  | TNGGS  | SKRELL | -LPRD  | GLG    | QIAAHT | FAF    | RELAA   | ATMNF  | HPD   | TF    | LGE    | GGFGR | VYKGR |       |       |       |      |     |   |      |         |         |
| GmPBS1-1 | 40  | KLRSR  | -SNGG  | SKREL  | QQP    | PPT    | -VOIAA | QTF    | TFRE    | LAAAT  | KNFR  | PE    | SFV    | GEG   | GFGR  | VYKGR |       |       |      |     |   |      |         |         |
| GmPBS1-2 | 53  | KLRST  | TSGE   | SKREL  | ---    | AAA    | -VOIAA | QIF    | TFRE    | LAAAT  | KNF   | MP    | Q      | SF    | LGE   | GGFGR | VYKGL |       |      |     |   |      |         |         |
| GmPBS1-3 | 61  | KLRST  | TSGN   | GE     | ---    | STA    | -VOIAA | QTF    | SF      | RELAA  | ATK   | NFR   | PE     | SF    | LGE   | GGFGR | VYKGR |       |      |     |   |      |         |         |
| AtPBS1   | 105 | LDSTG  | QVVAV  | KQLDR  | NGLQ   | GNRE   | FLVE   | VLMLS  | LLHHP   | NLVN   | LIGY  | CADG  | DQR    | LLV   | YEFMP |       |       |       |      |     |   |      |         |         |
| GmPBS1-1 | 98  | LETTA  | QTVAV  | KQLDR  | KNGL   | QGNRE  | FLVE   | VLMLS  | LLHHP   | NLVN   | LIGY  | CADG  | DQR    | LLV   | YEFMP |       |       |       |      |     |   |      |         |         |
| GmPBS1-2 | 109 | LETTG  | QVVAV  | KQLDR  | DGLQ   | GNRE   | FLVE   | VLMLS  | LLHHP   | NLVN   | LIGY  | CADG  | DQR    | LLV   | YEFMP |       |       |       |      |     |   |      |         |         |
| GmPBS1-3 | 114 | LETTG  | QVVAV  | KQLDR  | NGLQ   | GNRE   | FLVE   | VLMLS  | LLHHP   | NLVN   | LIGY  | CADG  | DQR    | LLV   | YEFMP |       |       |       |      |     |   |      |         |         |
| AtPBS1   | 165 | LGSLE  | DHLHD  | LPPDKE | ALDWN  | MRMKIA | AAGAA  | KGLE   | E       | LHDKAN | PPVI  | YRDF  | FKSS   | NILL  | DEG   |       |       |       |      |     |   |      |         |         |
| GmPBS1-1 | 158 | LGSLE  | DHLHD  | LPPDKE | PLDWN  | TRMKIA | VGA    | AAKGLE | YLHDKAN | PPVI   | YRDF  | FKSS  | NILL   | DEG   |       |       |       |       |      |     |   |      |         |         |
| GmPBS1-2 | 169 | LGSLE  | DHLHD  | LPPDKE | PLDWN  | TRMKIA | AAGAA  | KGLE   | YLHDKAN | PPVI   | YRDF  | FKSS  | NILL   | DEG   |       |       |       |       |      |     |   |      |         |         |
| GmPBS1-3 | 174 | FGSLE  | DHLHD  | LPPDKE | PLDWN  | TRMKIA | AAGAA  | KGLE   | YLHDKAN | PPVI   | YRDF  | FKSS  | NILL   | DEG   |       |       |       |       |      |     |   |      |         |         |
| AtPBS1   | 225 | FHPKLS | DFGLAK | LGP    | TGDK   | SHV    | STRVM  | GT     | YGY     | CAPE   | EYAMT | GQ    | LTVK   | SDV   | YF    | GVV   | FLELI |       |      |     |   |      |         |         |
| GmPBS1-1 | 218 | YHPKLS | DFGLAK | LGP    | VGDK   | SHV    | STRVM  | GT     | YGY     | CAPE   | EYAMT | GQ    | LTVK   | SDV   | YF    | GVV   | FLELI |       |      |     |   |      |         |         |
| GmPBS1-2 | 229 | YHPKLS | DFGLAK | LGP    | VGDK   | SHV    | STRVM  | GT     | YGY     | CAPE   | EYAMT | GQ    | LTVK   | SDV   | YF    | GVV   | FLELI |       |      |     |   |      |         |         |
| GmPBS1-3 | 234 | YHPKLS | DFGLAK | LGP    | VGDK   | SHV    | STRVM  | GT     | YGY     | CAPE   | EYAMT | GQ    | LTVK   | SDV   | YF    | GVV   | FLELI |       |      |     |   |      |         |         |
| AtPBS1   | 285 | TGRKA  | IDSE   | MPHGE  | QNLVA  | WARPL  | FNDR   | RRKF   | I       | KLADP  | R     | LKGR  | F      | P     | TRALY | QALAV | ASMC  | IQ    |      |     |   |      |         |         |
| GmPBS1-1 | 278 | TGRKA  | IDST   | OPGE   | QNLV   | TWAR   | PLFN   | DRRKF  | S       | KLADP  | R     | LQGR  | F      | P     | MRGLY | QALAV | ASMC  | IQ    |      |     |   |      |         |         |
| GmPBS1-2 | 289 | TGRKA  | IDSTR  | PHGE   | QNLV   | TWAR   | PLFN   | DRRKF  | P       | KLADP  | O     | LQGR  | F      | P     | MRGLY | QALAV | ASMC  | IQ    |      |     |   |      |         |         |
| GmPBS1-3 | 294 | TGRKA  | IDSTR  | PHGE   | QNLV   | TWAR   | PLFS   | DRRKF  | P       | KLADP  | O     | LQGR  | F      | P     | MRGLY | QALAV | ASMC  | IQ    |      |     |   |      |         |         |
| AtPBS1   | 345 | EQAAT  | RPLI   | ADV    | TALS   | YLANQ  | AYD    | PSK    | ---     | DDSR   | RNR   | DERG  | ARL    | I     | TRND  | D     | GGG   | SGSKF |      |     |   |      |         |         |
| GmPBS1-1 | 338 | ESAAT  | RPLI   | GDV    | TALS   | YLANQ  | AYD    | PNG    | YRGS    | SDD    | KRNR  | DDK   | GGRI   | -     | SKND  | E     | AGG   | SGRW  |      |     |   |      |         |         |
| GmPBS1-2 | 349 | EQAAA  | RPLI   | GDV    | TALS   | YLANQ  | AYD    | HRG    | --      | GT     | GDD   | KRNR  | V      | LKNG  | ---   | EGG   | GGG   | SGRW  |      |     |   |      |         |         |
| GmPBS1-3 | 354 | EQAAA  | RPLI   | GDV    | TALS   | YLANQ  | AYD    | HRG    | --      | AGDD   | K     | RNR   | DDK    | GGRI  | -     | LKND  | V     | GGG   | SGRW |     |   |      |         |         |
| AtPBS1   | 401 | DLEGSE | K      | DS     | PRE    | TAR    | I      | LN     | ---     | RD     | INR   | ERAV  | AEAK   | MW    | GESL  | REKR  | RO    | SEQ   | -G   | TSE | S | STG  |         |         |
| GmPBS1-1 | 397 | DLEGSE | K      | DDS    | PRE    | TAR    | I      | LN     | ---     | RD     | LDR   | ERAV  | AEAK   | MW    | GENL  | R     | OKR   | K     | OSL  | OG  | - | SLDA | ---     |         |
| GmPBS1-2 | 402 | DLEGSE | K      | DDS    | PRE    | TAR    | M      | LNS    | N       | NRDL   | DRER  | AVAE  | AK     | MW    | GENW  | R     | REKR  | RO    | SAQ  | -   | G | -    | SFDGSNA |         |
| GmPBS1-3 | 410 | DLEGSE | K      | DDS    | PRE    | TAR    | M      | L      | ---     | N      | RDL   | DRER  | AVAE   | AK    | T     | WGEN  | W     | REKR  | RO   | SAQ | - | G    | -       | SFDGSNA |

**Supplemental Figure 3. Full-length amino acid sequence alignment between Arabidopsis PBS1 and the soybean PBS1 homologs.** Sequence conservation between Arabidopsis PBS1 (*AtPBS1*) and the soybean PBS1 orthologous proteins (*GmPBS1-1*, *GmPBS1-2*, and *GmPBS1-3*). Sequence alignment was performed using Clustal Omega (Sievers et al., 2011). Numbers on the left indicate amino acids positions. Conserved amino acid residues and conservative substitutions are shaded in black and grey backgrounds, respectively. Putative myristoylation and palmitoylation sites are indicated with red and blue boxes, respectively. The activation segment is indicated with a green box and the AvrPphB cleavage site with a black arrow.

**A**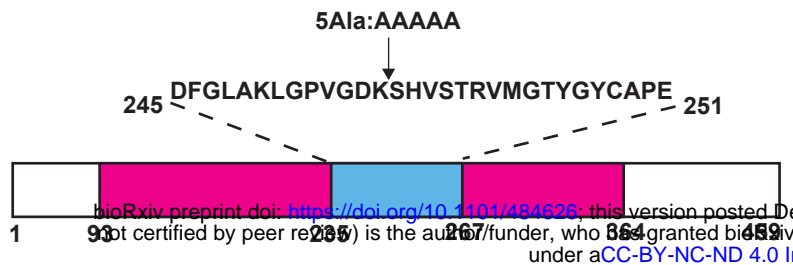**B**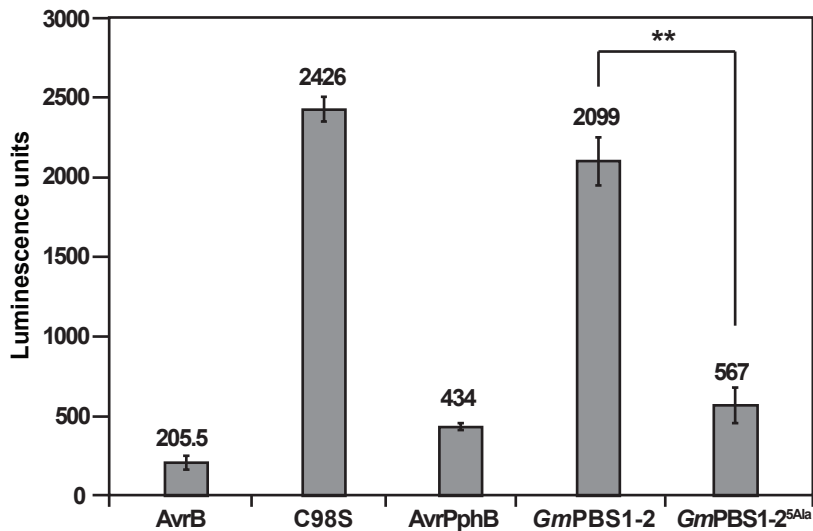

**Supplemental Figure 4. Transient expression of the *GmPBS1-2*<sup>5Ala</sup> derivative activates cell death in soybean (cv. Williams 82).** A) Schematic representation of the *GmPBS1-2*<sup>5Ala</sup> derivative. The predicted kinase domain (amino acids 93-364) and activation segment (amino acids 235-267) of *GmPBS1-2* are represented by a magenta box and a cyan blue box, respectively. The amino acid sequence of the activation segment and the location of the five-alanine insertion are indicated above. B) Transient expression of the *GmPBS1-2*<sup>5Ala</sup> derivative activates cell death in soybean protoplasts. The indicated constructs were transiently co-expressed along with *Renilla* Luciferase in soybean (cv. Williams 82) protoplasts. Values represent the mean ± S.D. for two technical replicates. T-tests were performed for the pair-wise comparison. The double asterisk indicates significant difference ( $p < 0.01$ ). Two independent experiments were performed with similar results. The results of one experiment are shown.



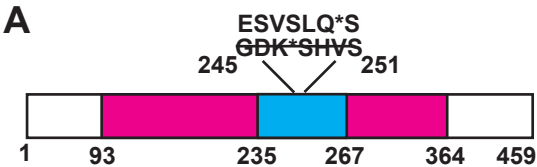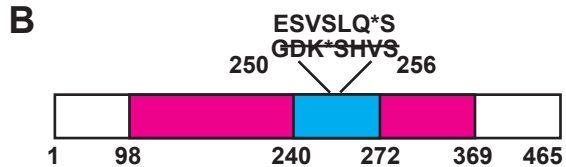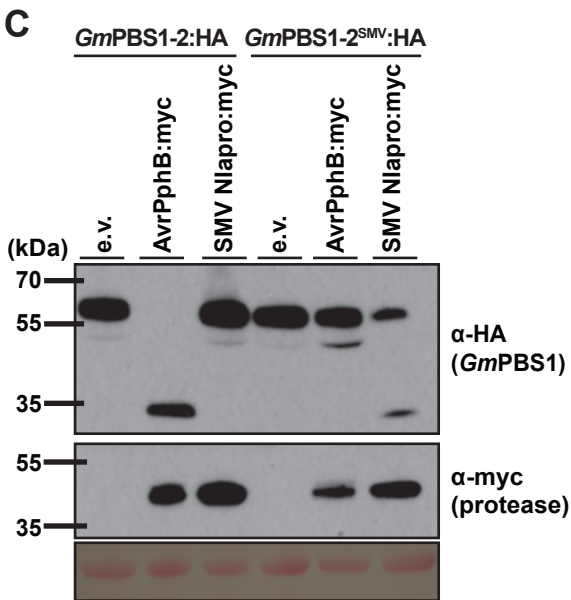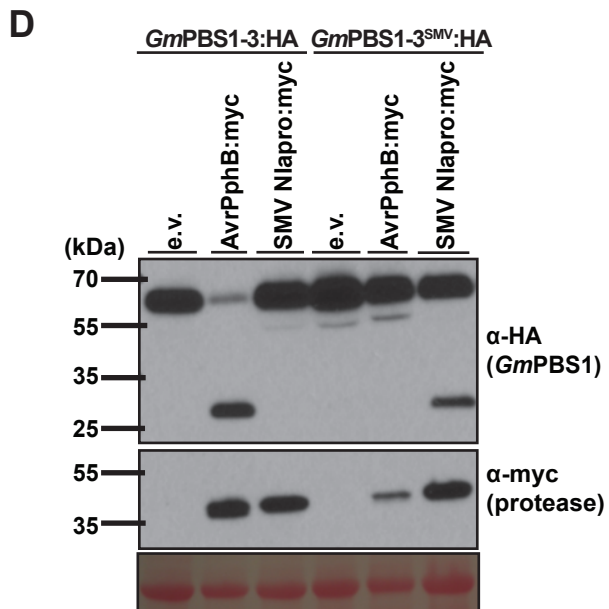

**Supplemental Figure 5. SMV Nla-mediated cleavage of the *GmPBS1-2*<sup>SMV</sup> and *GmPBS1-3*<sup>SMV</sup> decoy proteins in *N. benthamiana*.** A-B) Schematic representation of the synthetic *GmPBS1-2*<sup>SMV</sup> and *GmPBS1-3*<sup>SMV</sup> decoy proteins. The predicted kinase domain of *GmPBS1-2* (amino acids 93-364) and *GmPBS1-3* (amino acids 98-369) is represented by a magenta box. The predicted activation segment of *GmPBS1-2* (amino acids 235-267) and *GmPBS1-3* (amino acids 240-272) is represented by a cyan blue box. The native AvrPphB cleavage site in *GmPBS1-2* and *GmPBS1-3* (GDKSHVS) was substituted with the cleavage site sequence recognized by the SMV Nla protease (ESVSLQS). The asterisks indicate the location of cleavage by the respective proteases within the recognition sites. C-D) Cleavage of the *GmPBS1-2*<sup>SMV</sup> and *GmPBS1-3*<sup>SMV</sup> artificial decoy proteins by the SMV Nla protease. HA-tagged *GmPBS1-2*, *GmPBS1-2*<sup>SMV</sup>, *GmPBS1-3*, or *GmPBS1-3*<sup>SMV</sup> were transiently co-expressed with either empty vector (e.v.), AvrPphB:myc, or SMV Nlapro:myc in *N. benthamiana*. Total protein was extracted nine hours post-transgene induction and immunoblotted with the indicated antibodies. Ponceau S solution staining was included as a control to show equal loading of protein samples. Three independent experiments were performed with similar results. The results of only one experiment are shown.
